1  
2  
3  
4  
5  
6  
7  
8  
9  
10  
11  
12  
13  
14  
15  
16  
17  
18  
19  
20  
21

Host-specific gene expression as a tool for introduction success in *Naupactus*  
parthenogenetic weevils

Ava Mackay-Smith<sup>1</sup>, Mary Kate Dornon<sup>1</sup>, Rosalind Lucier<sup>1</sup>, Anna Okimoto<sup>1</sup>, Flavia Mendonca de Sousa<sup>1</sup>, Marcela Rodriguez<sup>2</sup>, Viviana Confalonieri<sup>2</sup>, Analia A. Lanteri<sup>3</sup> and Andrea S. Sequeira<sup>1\*</sup>

<sup>1</sup> Department of Biological Sciences, Wellesley College, Wellesley, Massachusetts, United States of America

<sup>2</sup> Facultad de Ciencias Exactas y Naturales, Universidad de Buenos Aires, Buenos Aires, Argentina

<sup>3</sup> Facultad de Ciencias Naturales y Museo, Universidad de La Plata, La Plata, Argentina

\* Corresponding author

E-mail: [asequeir@wellesley.edu](mailto:asequeir@wellesley.edu) (ASS)

## 22 **Abstract**

23

24 Food resource access can mediate establishment success in invasive species, and generalist  
25 herbivorous insects are thought to rely on mechanisms of transcriptional plasticity to respond to  
26 dietary variation. While asexually reproducing invasives typically have low genetic variation, the  
27 twofold reproductive capacity of asexual organisms is a marked advantage for colonization. We  
28 studied host-related transcriptional acclimation in parthenogenetic, invasive, and polyphagous  
29 weevils: *Naupactus cervinus* and *N. leucoloma*. We analyzed patterns of gene expression in three  
30 gene categories that can mediate weevil-host plant interactions through identification of suitable  
31 host plants, short-term acclimation to host plant defenses, and long-term adaptation to host plant  
32 defenses and their pathogens. This approach employed comparative transcriptomic methods to  
33 investigate differentially expressed host detection, detoxification, immune defense genes, and  
34 pathway-level gene set enrichment. Our results show that weevil gene expression responses can  
35 be host plant-specific, and that elements of that response can be transgenerational. Some host plant  
36 groups, such as legumes, appear to be more taxing as they elicit a complex gene expression  
37 response which is both strong in intensity and specific in identity. However, the weevil response  
38 to taxing host plants shares many differentially expressed genes with other stressful situations,  
39 such as host plant cultivation conditions and transition to novel host, suggesting that there is an  
40 evolutionarily favorable shared gene expression regime for responding to different types of  
41 stressful situations. Modulating gene expression in the absence of other avenues for phenotypic  
42 adaptation may be an important mechanism of successful colonization for these introduced insects.  
43

## 44 **Introduction**

45

## 46 **Invasiveness and diet breadth**

47         Prevailing theories suggest that the majority of non-native species introduced to new  
48 habitats fail to establish due to travel stress, climate incompatibility, inadequate or inappropriate  
49 food resources, or small population size, among other factors (1). For species that do successfully  
50 establish, their potential to dynamically adapt phenotypic expression to environmental conditions  
51 (2) is thought to be correlated with establishment success (3). If the underlying biological causes  
52 behind invasion success were to be identified, global invasive control methods could be more  
53 targeted and efficient (4).

54         Food resource access can mediate invasive species establishment success (1). Herbivorous  
55 invasive insect species are on a continuum with regard to their dietary specialization (5). In general,  
56 species that feed on one or a few closely related plant species are considered to be monophagous  
57 “specialist” herbivores, whereas species that feed on more than one plant family are polyphagous  
58 “generalist” herbivores. Variation in species phenotype, including diet, can be caused by genetic  
59 and/or environmental factors (6). It has been proposed that a species that consumes varied host  
60 plants must account for differentiation between plants and develop an all-purpose phenotype (3),  
61 whereas a species that consumes one to a few plants can specifically optimize its usage: this set of  
62 evolutionary tradeoffs is often summarized as ‘jack of all trades, master of none’ (5). Other work  
63 has proposed that divergence in diet breadth is a byproduct of nonadaptive evolutionary forces  
64 such as drift (7). Data on gene expression in generalist herbivores supports the trade-off idea,  
65 finding that generalist herbivores have less fine-tuned gene regulation responding to different host  
66 plant diets, and broader patterns of gene regulation occur in generalists compared to specialists

67 (8). In general, herbivorous insect generalists are thought to rely on transcriptional plasticity to  
68 respond to dietary variation (9,10).

69

## 70 **Invasiveness and asexuality**

71 The general-purpose genotype hypothesis (3) has been applied to invasive asexual  
72 organisms to explain their success. This hypothesis (as proposed by Lanteri and Normark, 1995)  
73 postulates that asexually reproducing species tend to have less strict habitat requirements, which  
74 allows wider spatial and environmental ranges compared to related sexual species. Asexually  
75 reproducing species require only one individual to start a population, which is advantageous for  
76 establishment and invasiveness (11). The twofold reproductive capacity of asexual organisms is a  
77 marked advantage for invasion (12,13).

78 Within the weevil tribe Naupactini, several flightless species have been found to reproduce  
79 parthenogenetically (11). Reduced flight capacity has been hypothesized to be positively related  
80 to parthenogenetic species colonization in heterogeneous landscapes (13). Furthermore,  
81 flightlessness and obligate parthenogenesis have been linked to extreme polyphagy in successfully  
82 invasive insects (12).

83 *Naupactus* weevils are a taxonomic group of approximately 170 species of medium-sized  
84 weevils, covering a native geographic range between Mexico and Argentina (14–16). The asexual  
85 weevil species *Naupactus cervinus* and *N. leucoloma* reproduce via apomictic parthenogenesis, in  
86 which offspring are produced from unfertilized, diploid egg cells. Parthenogenetic species are  
87 thought to establish successfully due to their ability to preserve successful genotypes via clonal  
88 reproduction, as beneficial gene relationships are preserved under extreme linkage disequilibrium  
89 (17).

90 Fuller's rose weevil, *Naupactus cervinus*, is a highly polyphagous species (12,18). Native  
91 to South America, it has successfully established invasive populations in many countries via  
92 commercial trade, including the United States and Australia (19). The white-fringed weevil,  
93 *Naupactus leucoloma*, is also parthenogenetic, invasive, and highly polyphagous (20). Native to  
94 central and northern Argentina, southern Brazil and Uruguay, this species has successfully  
95 established populations in Chile, Peru, Australia, New Zealand, South Africa, and the United  
96 States (21). Most damage to crops and other host plants by both weevil species is caused by larvae  
97 feeding on roots, while the damage caused by the leaf feeding adults is usually less significant  
98 (22).

99 Even in the absence of genetic variation, parthenogenetic species can still become  
100 successfully established invasive species. In that case, what kinds of genetic and/or transcriptional  
101 adaptation and acclimation do these parthenogenetic species employ to acclimate to a new  
102 environment?

### 103 **Differential gene expression in targeted gene categories**

104 A comparative transcriptomic approach was employed to measure phenotypic variation of  
105 *Naupactus* weevils in response to host plant type, specifically focusing on differential expression  
106 of genes that mediate functions that may impact invasion success. We also explored  
107 transgenerational changes in gene expression, given that transgenerational epigenetic  
108 modifications have been found to impact the expression of fundamental survival traits (i.e. lifespan  
109 and age at maturity) (23,24).

110 One well-documented group of genes important for finding suitable host plant species in  
111 herbivorous insects are host detection genes associated with olfaction and taste, such as odorant-  
112 binding proteins (25–27). Another key functionality important for herbivore adaptation is that of

113 detoxification and neutralization of plant secondary compounds; differential regulation of  
114 detoxification genes has been correlated with successfully feeding on new host plants (28).  
115 Detoxification genes may form the short-term first line of defense for herbivorous insects  
116 introduced to a new host (29). Moreover, detoxification of host plant defenses may continue to be  
117 a challenge given that a generalist's longer-term response to a new host has been shown to include  
118 three times more differentially expressed genes related to detoxification (30). Gene pathways  
119 known to be involved in the detoxification response of herbivorous insects include *cytochrome*  
120 *p450*, *glutathione-S-transferases*, *UDP-glycosyltransferases*, *carboxylesterases*, *ABC*  
121 *transporters*, and *glutathione peroxidases* (26,31,32).

122         Generalist herbivores feeding on a variety of plants are also often exposed to a wider range  
123 of pathogens and toxins, which drives a stronger selective pressure on generalists' immune systems  
124 (33). Host plants of different nutritional qualities and defense capacities could alter herbivore  
125 immune defense response in a species-specific manner (33,34), or generalists may have evolved  
126 general immune defense upregulation mechanisms that do not vary between hosts (35).  
127 Alternatively, resource investment in immune defense mechanisms could decrease as introduced  
128 invertebrates move away from their co-adapted pathogens (4). According to the enemy release  
129 hypothesis (36), individuals in a new environment will reallocate resources associated with  
130 immune defense towards growth and reproduction.

131         Our analysis therefore includes five groups of contrasts as detailed below: two between  
132 weevils feeding on hosts from different plant families (Legume vs. Other, Legume vs. Citrus); one  
133 between weevils feeding on hosts under different cultivation conditions (Conventional vs  
134 Organic); one between weevils feeding on host plants within the same host plant family (including  
135 members from Rutaceae, Fabaceae, and Asteraceae); and finally, one between weevils feeding

136 continuously on one host plant versus weevils that have been transferred onto a previously un-  
137 encountered, but edible host. In those contrasts we will explore differential regulation of genes  
138 related to olfaction and chemosensory cues, those related to detoxification of host plant secondary  
139 compounds, and those related to immune system response genes. We will explore differences in  
140 the number of upregulated genes, the intensity of the increased expression (measured in fold  
141 change and other indexes of differential expression), and numbers of uniquely differentially  
142 expressed genes in all three gene categories in both immature and adult tissues.

143

144 **Predictions for expression patterns in weevils feeding on Legume hosts vs. other (non-**  
145 **legume) hosts.**

146 As potential host plants, legumes harbor a high diversity of defensive secondary  
147 metabolites, including alkaloids, amines, cyanogenic glucosides, and non-nitrogen-based  
148 compounds such as phenolics and terpenoids (37). Cyanogenic glucosides in particular are lethal  
149 to most herbivores, as they can disrupt cellular respiration and effectively shut down cellular  
150 functionality. Nitrogen-based defensive compounds are fairly unique to Fabaceae due to their  
151 association with nitrogen-fixing rhizobia. High levels of nitrogen in host plants are preferred by  
152 insect herbivores (38), because insects cannot produce their own nitrogen and must derive nitrogen  
153 nutritionally (9,25). Previous studies indicate that herbivorous insects perform best on plants with  
154 high levels of rhizobial interactions (38). Because these legume-specific chemical defenses are  
155 damaging to herbivorous insects, there is a strong evolutionary pressure on legume-feeding species  
156 to develop adaptive mechanisms by which they can effectively break down these nitrogen-based  
157 defensive compounds (25). In *Naupactus* specifically, *N. cervinus* larvae performed better on a  
158 legume host (18), and *N. leucoloma* has been shown to prefer legume species (39). We predicted

159 that when comparing differentially expressed genes between *N. cervinus* and *N. leucoloma* weevils  
160 feeding on legume host plants versus other (non-legume) host plants, there will be more differential  
161 regulation of genes in the three targeted categories in weevils feeding on legume host plants in  
162 both adult and immature tissues.

163

#### 164 **Predictions for expression patterns in weevils feeding on Legume hosts vs. Citrus hosts**

165 Citrus (family Rutaceae: subfamily Citrinae) also produce a variety of defensive secondary  
166 metabolite compounds, such as limonoids, flavonoids, alkaloids, carotenoids, and phenol acids  
167 (40). As some of these defensive compounds are unique to citrus, successful citrus herbivore  
168 species must have some counteracting or defensive mechanisms to allow them to survive. Despite  
169 the systemic nature of many citrus species' defense responses, some of the strongest chemical  
170 defenses produced by citrus, such as limonene, occur in the fruit itself, which *Naupactus* does not  
171 consume (ex. (41)). Because *Naupactus* larvae feed on root tissue while adults feed on leaf tissue,  
172 it is likely that the secondary metabolites produced by legumes will be more deleterious to  
173 *Naupactus* weevils than those produced by citrus. We predicted that when comparing differentially  
174 expressed genes between *N. cervinus* weevils feeding on legume host plants versus citrus host  
175 plants, there will be more differential regulation of genes in the three targeted categories in weevils  
176 feeding on legume host plants in both adults and immature tissues.

177

#### 178 **Predictions for expression patterns in weevils feeding on organically grown vs.** 179 **conventionally grown oranges**

180 There is inconsistent evidence regarding the effects of organic versus conventional farming  
181 techniques on agricultural pest burdens. Some research proposes that generalist diets predispose



182 herbivorous insects towards evolving effective insecticide resistance, making feeding on  
183 conventional hosts less costly (7). Regardless of herbivore diet breadth, the assumption is that  
184 applying insecticides to host plants will make insect feeding more difficult, and conversely,  
185 reducing chemical insecticide usage on plants will increase the pest burden (42). However, no  
186 significant correlation was found between pest damage and farming management approaches for  
187 garden tomatoes (42); it is possible that organically grown plants *not* exposed to insecticides are  
188 capable of synthesizing their own chemical defenses. The addition of insecticides to a  
189 conventionally raised plant may interfere with the natural defense response of the plant, and an  
190 organically raised plant may be able to upregulate its defensive response in ways that  
191 conventionally raised plants cannot. We predicted that when comparing differentially expressed  
192 genes between weevils feeding on organically treated host plants versus conventionally treated  
193 host plants, there will be more differential regulation of genes in the three targeted categories in  
194 weevils feeding on organically cultivated host plants in both adults and immature tissues.

195

196 **Predictions for expression patterns in weevils feeding on different host plants within the**  
197 **same host plant family**

198 If it is true that legume and citrus hosts are more resource-taxing to herbivores compared  
199 to other hosts, it could be expected that herbivores that feed on highly chemically defended species  
200 will have more species-specific transcriptional responses, and that the weevils consuming these  
201 host plants have acclimated to these defenses.

202 Because of this acclimation, we predicted larger numbers of unique expression patterns  
203 between weevils feeding on citrus members (Rutaceae), and between those feeding on legume  
204 members (Fabaceae), than between those feeding on members of a non-citrus, non-legume group

205 (Asteraceae), even though the degrees of phylogenetic relatedness between host plants within each  
206 family are not equivalent. Furthermore, there will be more differential regulation of genes in the  
207 three targeted categories in weevils feeding on legume and citrus host plant family members  
208 relative to those from the non-citrus, non-legume host plant family comparisons.

209

## 210 **Predictions for expression patterns in weevils feeding on their natal host plant vs. a novel** 211 **host plant**

212 In polyphagous herbivores that can consume several host plants, a shift from consuming  
213 one host plant to a different host plant has been previously associated with high transcriptional  
214 responses (8,9,29). Although patterns of transcriptional response to short-term host plant switching  
215 are characterized by highly specific gene responses, these responses occur within a small number  
216 of gene families, indicating the potential for common pathways of host plant acclimation and  
217 adaptation in generalist arthropods (29).

218 When comparing differentially expressed genes between *N. cervinus* weevils feeding on  
219 their natal host plant versus those feeding on a novel host plant, we predicted that that there will  
220 be more differential regulation of genes in the three targeted categories in weevils feeding on the  
221 novel host in both adults and immature tissues.

222

## 223 **Exploration of global expression patterns in all host plants and experimental contrasts**

224 It is entirely possible that important aspects of weevil acclimation and/or adaptation to  
225 feeding on resource-taxing host plants, or on novel hosts, may involve differential regulation of  
226 genes beyond the three targeted gene categories of detection, detoxification and immune response.  
227 For example, a plastic response, as measured by a wider array of upregulated gene sets, was

228 recorded in milkweed aphids feeding on novel host plants (43), and specific gene expression  
229 response trajectories were elicited in response to different sugar-mimic alkaloids in silk moths  
230 (44).

231 In insects, developmental gene networks are well-known and have been profiled in several  
232 species (45); thus, it is not implausible to hypothesize that other tightly synchronized gene  
233 networks might exist. Metabolic pathways have also been found to be key in herbivore response  
234 to host plant defenses (46). We use a global gene set enrichment approach to elucidate overall  
235 patterns of expression by gene family. Together with the observed patterns in the three targeted  
236 gene categories, the goal of these analyses is to understand the role of host plant acclimation and  
237 adaptation in introduced species.

239           We sought to profile the transcriptome of successfully invasive, but paradoxically asexual,  
240 insects, and determine how life stage, host plant, and environmental conditions affect gene  
241 regulation in these species. We have successfully established that gene expression response of  
242 weevils can be specific to particular host plants, and that elements of that response can be  
243 transgenerational. We have gained understanding of how some host plants are more taxing to  
244 weevils eliciting strong and specific gene expression response. However, we also found  
245 commonalities to the response of taxing host plants and other stressful situations such as host plant  
246 cultivation conditions and/or a transition to a novel host.

247

## 248 RESULTS

### 249 Weevils display host-specific gene expression responses in the three targeted gene categories

250

251

252 **Legume host plants generate large transcriptional responses:** For both *N. cervinus* and *N.*  
253 *leucoloma*, there were significantly more upregulated host detection (HD), detoxification (DTX),  
254 and immune defense (IM) genes in weevils feeding on legume host plants (Fig 1i). In legume-  
255 feeding weevils, odorant-binding proteins were the most numerous HD genes overexpressed;  
256 *cytochrome P450* type genes were the most numerous DTX genes overexpressed; and serine  
257 proteases and proteinases were the most numerous IM genes overexpressed (Fig 1i). Furthermore,  
258 the differences in the numbers of upregulated genes between host plants in all three gene categories  
259 were significantly impacted by the different functional groups within each category, displaying  
260 significant interactions between Host:Functional Gene Group (Table 1). However, there was no  
261 discernible effect of tissue type for any of the three target gene categories, as evidenced by non-  
262 significant Host:Tissue interactions (Table 1). Finally, when exploring the interaction of tissue  
263 effects and functional group effects on differentially expressed gene (DEG) differences between  
264 host plants, we found that both factors significantly impacted the expression of DTX genes only  
265 in *N. cervinus*.

266 **Fig 1. Number of differentially upregulated genes in three targeted gene categories from**  
267 **weevil species feeding on different host plants or in different experimental conditions.**  
268 Categories analyzed include genes related to host plant detection (HD), host plant detoxification  
269 (DTX) and immune defense (IM) when comparing: (i) weevils feeding on Legume vs. Other in *N.*  
270 *cervinus* and *N. leucoloma*; (ii) *N. cervinus* weevils feeding on Legume vs. Citrus; (iii) *N. cervinus*  
271 weevils feeding on oranges grown under Conventional vs. Organic farming methods; (iv) *N.*  
272 *cervinus* weevils maintained on the natal host plant or switched from that host to a novel host -  
273 Switch vs. Maintain; (v) weevils feeding within the same host plant family: Citrus (Rutaceae:  
274 Citrinae), Legume (Fabaceae), or Other (Asteraceae) host plants. Each point represents a separate

275 pairwise comparison in the set; i.e. one triangle represents the number of DEGs from a head tissue  
 276 comparison that belongs in the group ‘Legume vs. Citrus’.

277 **Table 1. Summary of comparisons of the numbers of differentially upregulated genes in three gene**  
 278 **categories for weevil species feeding on different host plants or experimental conditions.**

| Host plant contrasts                       | Species                          | Functional Gene Group | Differences between #s of upregulated genes when feeding on different host plants | Interaction  |                             |                               |
|--------------------------------------------|----------------------------------|-----------------------|-----------------------------------------------------------------------------------|--------------|-----------------------------|-------------------------------|
|                                            |                                  |                       |                                                                                   | Host: Tissue | Host: Functional Gene Group | Tissue: Functional Gene Group |
| Legume vs. Other                           | <i>N. cervinus</i>               | HD                    | <0.05*                                                                            | NS           | <0.05*                      | NS                            |
|                                            |                                  | DTX                   | <0.05*                                                                            | NS           | <0.01**                     | <0.01**                       |
|                                            |                                  | IM                    | <0.05*                                                                            | NS           | <0.01**                     | NS                            |
|                                            | <i>N. leucoloma</i>              | HD                    | <0.05*                                                                            | NS           | <0.01**                     | NS                            |
|                                            |                                  | DTX                   | <0.05*                                                                            | NS           | <0.01**                     | NS                            |
|                                            |                                  | IM                    | <0.05*                                                                            | NS           | <0.01**                     | NS                            |
| Legume vs. Citrus                          | <i>N. cervinus</i>               | HD                    | NS                                                                                | NS           | NS                          | <0.05*                        |
|                                            |                                  | DTX                   | NS                                                                                | NS           | <0.01**                     | NS                            |
|                                            |                                  | IM                    | NS                                                                                | NS           | NS                          | <0.01**                       |
| Conventional vs. Organic                   | <i>N. cervinus</i>               | HD                    | <0.05*                                                                            | NS           | <0.05*                      | NS                            |
|                                            |                                  | DTX                   | NS ‡                                                                              | NS           | <0.01**                     | NS                            |
|                                            |                                  | IM                    | NS                                                                                | NS           | <0.01**                     | NS                            |
| Within-host Family (Citrus, Legume, Other) | <i>N. cervinus, N. leucoloma</i> | HD                    | NS                                                                                | NS †         | NS                          | NS                            |
|                                            |                                  | DTX                   | <0.05* (C-L; L-O);<br>NS (C-O)                                                    | <0.01**†     | <0.01**                     | <0.05*                        |
|                                            |                                  | IM                    | NS                                                                                | NS †         | <0.01**                     | <0.01**                       |
| Switch vs. Maintain                        | <i>N. cervinus</i>               | HD                    | NS                                                                                | NS           | <0.01**                     | NS                            |
|                                            |                                  | DTX                   | <0.05*‡                                                                           | NS           | <0.01**                     | NS                            |
|                                            |                                  | IM                    | NS                                                                                | NS           | <0.01**                     | NS                            |

279 Results are displayed by prediction, species and gene category (HD: host detection; DTX: host  
 280 detoxification and IM: immune defense). *P*-values displayed indicate significance for contrasts between  
 281 host plants (Wilcoxon signed-rank test). ANOVA interaction terms were calculated between host effects  
 282 and those of tissue (Host:Tissue) and functional gene groups within each gene category (Host:Functional

283 Gene Group) and between tissues and functional gene groups (Tissue:Functional Gene Group) (Robust  
284 rank-based ANOVA in package `Rfit`, derived from [Hettmansperger and McKean \(2010\)](#) and [Hocking](#)  
285 [\(1985\)](#). † indicates Kruskal-Wallis. ‡ indicates several individually significant functional gene groups. \*,  
286 \*\* indicate significance at  $p=0.05$  and  $p=0.01$ , respectively.  
287

288 Heatmaps revealed not only the number of upregulated genes, but also the intensity of  
289 expression for the DEGs that were differentially regulated. For *N. cervinus*, there was strong  
290 expression intensity for both DTX and IM genes in legume-feeding weevil abdomen samples (Fig  
291 2). Immature tissue also showed upregulation of DTX and IM genes, but expression intensity was  
292 high from both legume-feeding and other-feeding parents (Fig 2). For *N. leucoloma*, a clearer  
293 pattern was visualized wherein HD, DTX, and IM genes all had higher expression intensities in  
294 head tissue from legume-feeding weevils, but all three gene classes had higher expression  
295 intensities in abdominal tissue from other-feeding weevils.

296 **Fig 2. Composite heatmap showing expression intensity of significantly up- and**  
297 **downregulated genes in three gene categories including all available tissue types for weevils**  
298 **feeding on different host plants or in different experimental conditions.** Results are displayed  
299 by prediction, species and tissue for each gene category (host detection (HD), host detoxification  
300 (DTX) and immune defense (IM)) and each direction of expression. (i) contrasts when feeding on  
301 different plant families, farming methods and experimental conditions, (ii) feeding within the same  
302 host plant family: Citrus (Rutaceae: Citrinae) (c vs. c); Legume (Fabaceae) (l vs. l); and Other  
303 (Asteraceae) (o vs. o). Shades of red indicate upregulation in Group 1 while shades of blue indicate  
304 upregulation in Group 2.  
305

306 **Citrus host plants elicit similar numbers of herbivore DEGs relative to legumes, with**  
307 **interesting patterns in pre-feeding immatures:** Very few HD and IM genes made the cutoff  
308 criteria in these comparisons, and the number of upregulated genes are non-significantly different  
309 between host plants. A larger number of DTX genes made the cut-off criteria but neither the  
310 aggregate data, nor the data analyzed by gene, yielded significant differences between host plants  
311 (Fig 1ii). Despite the non-significant effects of host plant in all gene categories, we found that the  
312 differences in the numbers of upregulated DTX genes between host plants was significantly

313 impacted by the different functional groups within that category (with a significant  
314 Host:Functional Gene Group interaction). Again, there was no discernible effect of sampled tissue  
315 type, as evidenced by a non-significant Host:Tissue interaction (Table 1). Interestingly, the  
316 interaction of tissue effects and functional gene group effects on the DEG differences between host  
317 plants was significant for the expression of HD genes, but not for DTX genes in *N. cervinus*.

318 Heatmaps revealed that the weighted median expression intensity of DTX and IM genes in  
319 immature tissue with legume-feeding as well as citrus-feeding parents was quite high, indicating  
320 that both host conditions elicited differential expression in a similar number of genes of different  
321 identities. There was also strong expression of IM genes in abdominal tissues of legume-feeding  
322 adults (Fig 2i).

323

324 **Organically raised host plants elicit higher numbers of some herbivore host detection and**  
325 **detoxification genes relative to conventionally raised hosts:** As expected, there was a  
326 significantly higher number of HD-related olfaction and chemosensory genes upregulated in  
327 weevils feeding on organically cultivated host plants (Table 1, Fig 1iii). There was no significant  
328 difference between number of DTX genes when analyzed as an aggregate, but weevils feeding on  
329 organically grown oranges showed significantly larger numbers of upregulated genes in three  
330 specific DTX gene functional groups (*cytochrome p450*, *glutathione peroxidase* and *glutathione*  
331 *S-transferase*). Despite non-significant host effects on the number of upregulated genes in the IM  
332 gene category, there was a significant interaction in the Host:Functional group for all three gene  
333 categories (Table 1).

334 Heatmaps revealed a high intensity of expression for HD genes in immature tissue from  
335 larvae produced by weevils feeding on organically raised oranges, as well as in abdominal tissue



336 from weevils feeding on conventional oranges (Fig 2i). DTX genes had a higher median expression  
337 intensity in organically-feeding weevils compared to conventionally-feeding weevils in abdominal  
338 and immature tissues, although this did not hold true for all tissues; higher expression intensity  
339 was detected in head tissue of conventionally-feeding weevils.

340

341 **Within host plant family contrasts revealed stronger detoxification response in weevils**  
342 **feeding on different legumes:** Quantities of both HD and IM genes were not significantly  
343 different in contrasts within each host plant family (citrus, legumes, and asters), although there  
344 was a slightly higher number of both IM and HD genes upregulated in intra-legume comparisons  
345 (Fig 1v). When all DTX genes were considered in the aggregate, comparisons done between  
346 weevils feeding on different legume hosts had a significantly higher number of differentially  
347 expressed DTX genes. This also holds true when DTX genes are considered separately (Fig 1v).  
348 While the interaction of Host:Tissue was not significant for HD or IM genes, there was a  
349 significant interaction between tissue and host, and between tissue and functional gene group for  
350 DTX genes, suggesting that gene expression was influenced by the sampled tissue type for this  
351 class of genes (Table 1).

352 Heatmaps demonstrated that different host plant families required different degrees of  
353 species-specific attenuation for weevils, even if the hosts belong to the same group. For legume-  
354 legume comparisons, there was high expression intensity of DTX and IM genes but not of HD  
355 genes for adult tissues. For citrus-citrus comparisons, there were marked differences for expression  
356 intensity in HD and IM gene groups in both adult tissues, and in DTX genes only in immature  
357 tissues. For other-other (aster-aster) comparisons, there were strong expression intensity  
358 differences in IM and DTX genes in adult tissues (Fig 2i).

359

360 **Switching host plants increases herbivore expression of host detection and detoxification**

361 **genes in adults and pre-feeding immatures:** The number of upregulated genes between weevils  
362 in the natal versus novel host plants was not significantly different for HD genes (Fig 1iv). When  
363 the number of upregulated DTX genes between the two conditions was analyzed as an aggregate,  
364 there were higher numbers of DTX genes upregulated in the switch condition. Additionally, some  
365 of the DTX genes showed significantly higher numbers of upregulated genes in the switch  
366 condition, such as *ABC transporters*, *cytochrome P450s*, and *glutathione S-transferases*. For IM  
367 genes, the number of upregulated genes was not significantly different between the two conditions  
368 (Figure 1iv). There was no identifiable interaction of sampled tissue type for any of the three target  
369 gene categories, as evidenced by non-significant Host:Tissue and Tissue:Functional Gene Group  
370 interactions (Table 1).

371 In the natal/novel heatmaps, red coloration indicates positive expression intensity for  
372 weevils in the switch condition, whereas blue coloration indicates positive expression intensity in  
373 the maintained condition. HD genes showed upregulation in the switched weevils (Fig 2i),  
374 suggesting that although the number of HD genes was not elevated in the switched weevils (Fig  
375 1iv), the expression intensity of those DEGs was elevated. DTX gene expression intensities were  
376 also different, with all three tissue types registering higher median expression intensities in the  
377 switched condition. There were roughly equal levels of expression in IM genes for head and  
378 immature tissue between the switched vs. maintained weevils, indicating that similar numbers of  
379 different IM genes were expressed in both conditions at similar intensities. Abdominal tissue had  
380 a noticeably higher expression intensity than other tissue types in both the switch and maintain  
381 conditions (Fig 2i).

382

383 **Common herbivore DEG patterns in the three targeted gene categories across different host**

384 **plants and tissues:** *Expected and unexpected tissue-specific expression patterns in the three*

385 *targeted gene categories.* Expression of HD genes across weevil tissues presents a puzzling

386 pattern. We expected expression to be more pronounced in adult head tissues, and that is true in

387 *N. leucoloma* when feeding on legumes and when switching host plants (Fig 2i). However, we

388 observed higher expression levels in abdomen tissues in conventionally grown citrus and when

389 switching host plants. Interestingly, there was also strong expression of HD genes in immature

390 tissues when parents fed on organically grown oranges.

391 Weevils feeding on different species of citrus host plants displayed higher expression levels

392 of HD genes in all adult tissues relative to those feeding on different species of legume host plants

393 (Fig 2ii). Interestingly, the number of DEGs was significantly larger in the legume to legume

394 contrasts (Fig 1v).

395 As expected, expression of DTX genes was more prevalent in abdominal tissues when

396 feeding on almost every host plant, including legumes, organically grown oranges and when

397 switching host plants. However, we also saw strong expression of these genes in head tissues when

398 feeding on non-legumes and on organically grown oranges. There was also strong expression of

399 DTX genes in immature tissues when parents fed on legumes, organically grown oranges or on

400 different species of conventionally grown citrus.

401 The expression of IM genes was expected to be equally prominent in both adult tissues

402 (head and abdomen). That pattern is not seen in weevils feeding on legumes when contrasted with

403 feeding on non-legumes, or on conventional citrus, where there is no measurable difference in

404 expression in head tissues (Fig 2i). However, we saw generalized expression of IM genes in all

405 adult tissues when feeding on conventional or organic oranges, on different species of citrus (Fig  
406 2ii), or when switching to a novel host plant or maintaining the natal host plant (Fig.2i). We also  
407 observed widespread expression of IM genes to intermediate or high levels in immatures; this is  
408 true for almost all host plant contrasts (including within family contrasts) and experimental  
409 conditions.

410

411 *Detoxification DEGs are more host-specific than host detection and immune defense DEGs.* For  
412 host detection genes, the Legume vs. Other comparisons had the highest number of uniquely  
413 expressed genes, with 17 unique genes. Conventional vs. Organic and Switch vs. Maintain  
414 contained considerable overlaps with Legume vs. Other comparisons (31 and 37 genes,  
415 respectively) (Fig 3i). A set of 34 host detection genes were shared between all four comparison  
416 groups.

417 **Fig 3. Number of unique and shared differentially expressed genes (DEGs) associated with**  
418 **host detection, host detoxification and immune defense between comparisons.** Venn diagrams  
419 show overlaps or uniqueness in the identity of differentially expressed transcripts in either  
420 direction between comparisons. (i) four-way Venn diagrams including: Legume vs. Other, Legume  
421 vs. Citrus, Conventional vs Organic, and Switch vs. Maintain for host detection-related DEGs  
422 (HD), host detoxification-related DEGs (DTX) and immune defense-related DEGs (IM). (ii) three-  
423 way Venn diagrams including comparisons within the same host plant family: Citrus (Rutaceae:  
424 Citrinae); Legumes (Fabaceae); and Others (Asteraceae).

425

426 Venn diagrams for DEG identity in within host-family contrasts showed that there were no  
427 unique differentially expressed host detection genes for legume-legume (Fabaceae) nor citrus-  
428 citrus (Rutaceae) comparisons that were not shared between these two groups, which appears as a  
429 total overlap of 28 genes between the two families (Fig 3ii). There was an unexpectedly high  
430 number of host detection genes unique to the aster-aster host plant comparisons (Fig 3ii). Overall,  
431 there was a core set of 29 differentially expressed genes in common between all the included  
432 comparisons (Fig 3ii).

433 For detoxification genes, the Legume vs. Other comparisons had the highest number of  
434 uniquely expressed genes, with 49 unique genes, followed by Switch vs. Maintain comparisons,  
435 with 17 unique genes. Legume vs. Other and Switch vs. Maintain comparisons shared 35  
436 detoxification genes. A set of 12 genes was shared between all four comparison groups (Fig 3i).  
437 As seen in other gene categories, the identities of many of the detoxification DEGs in weevils  
438 introduced to novel hosts overlap with those overexpressed in the legume contrasts.

439 In within-family comparisons, legume-legume contrasts had the most unique differentially  
440 expressed genes, with 81 genes falling into that category, followed by citrus-citrus comparisons  
441 with 17 (Fig 3ii). Interestingly, 59 genes were shared between other-other and citrus-citrus  
442 comparisons (Fig 3ii). There was a small core of detoxification genes shared by all comparisons  
443 (3 DEGs), contrasting with the high numbers of legume-specific DEGs (81 DEGs).

444 For immune defense genes, the Legume vs. Other comparisons again had the highest  
445 number of uniquely expressed genes, with 11 unique genes. There was a large number of shared  
446 genes between Legume vs. Other, Conventional vs. Organic and Switch vs. Maintain (57 and 64  
447 genes, respectively). A core of 42 genes was shared between all four comparison groups (Fig 3i).

448 The comparisons of differentially expressed immune defense genes between weevils  
449 feeding on legumes had the most unique differentially expressed genes (77 DEGs), followed by  
450 citrus-citrus comparisons (17 DEGs); the Asteraceae (other) host plant comparisons had the fewest  
451 (3 DEGs) (Fig 3ii). There was also a core of 44 differentially expressed genes common to all  
452 comparisons (Fig 3ii).

453

454 **Exploration of transcriptome-wide expression patterns reveals common expression of GO**  
455 **terms between different host plants and treatments**

456 To see if and how changes in global GO term enrichment were unique, or specific, to each  
457 comparison condition, Venn diagrams for GO identity uniqueness were constructed for both  
458 positive and negative enrichment directions. Positively enriched gene sets shared between  
459 comparisons of Legume vs. Other (enriched in legume-feeding weevils relative to weevils feeding  
460 on other hosts) and Legume vs. Citrus (enriched in legume-feeding weevils relative to citrus-  
461 feeding weevils) included GO terms for “ribosome”, “ribosomal construction”, “translation”,  
462 “chitin metabolic process”, and “chitin binding” (Fig 4i). Although one might expect that genes  
463 enriched in legumes would be entirely shared between these two comparison groups, because the  
464 Group 2 (other hosts vs. citrus hosts) is different, there were also different GO terms exclusive to  
465 the two comparison groups (8 and 7 exclusive GO terms for Legume vs. Other and Legume vs.  
466 Citrus, respectively) (Fig 4i). Interestingly, there was also an overlap of five enriched GO terms  
467 between the Legume vs. Citrus comparisons and the Switch vs. Maintain comparisons (enriched  
468 in weevils switched to feeding on a novel host relative to weevils maintained on their natal host).  
469 There were 11 GO terms unique to the Switch vs. Maintain comparison group, indicating  
470 enrichment exclusive to the switched weevils, which is a much larger set of unique GO terms  
471 compared to other contrasts (Fig 4i). Interestingly, all of the unique enriched GO terms in Switch  
472 vs. Maintain were found in adult tissues (Fig 2i).

473 **Fig 4: Exploration of generalized expression changes specific to particular host plants or**  
474 **experimental conditions.** (i) Identity of upregulated Gene Ontology (GO) terms in G1; (ii)  
475 Identity of upregulated GO terms in G2, unique and/or shared between host plant contrasts and  
476 experimental conditions. Underline indicates the direction of the contrast, or which host plant  
477 group is overexpressing transcripts in that GO term. Parentheses after GO term descriptions  
478 contain the tissues where DE was found for each GO term (h: head, a: abdomen, and i: immature).  
479 Numerical identifiers for GO term abbreviations can be found in S3 Table.

480  
481 Negatively enriched GO terms (indicating enrichment in Group 2, rather than Group 1, for  
482 a given comparison group) also contained overlapping enriched GO terms (Fig 4ii). Two GO

483 terms, those for “carbohydrate metabolic process” and “hydrolase activity on O-glycosyl  
484 compounds”, were shared enriched terms between Legume vs. Other, Conventional vs. Organic,  
485 and Legume vs. Citrus (enriched in citrus-feeding weevils relative to legume-feeding weevils)  
486 comparisons (Fig 4ii). The more general GO term for “hydrolase activity” was an enriched shared  
487 term when either Citrus or Other were contrasted with Legumes (Legume vs. Citrus and Legume  
488 vs. Other)(Fig 4ii). Legume vs. Citrus comparisons contained a further 6 uniquely enriched GO  
489 terms (Fig 4ii). The Switch vs. Maintain contrast produced 7 uniquely enriched GO terms.  
490 Although it is difficult to identify why these terms are uniquely enriched in weevils maintained on  
491 their natal host, it is possible that transcripts that fall into these categories are instead  
492 underexpressed in weevils switching to a novel host plant.

493 Finally, Conventional vs. Organic comparisons contained the highest number of unique  
494 GO terms, with 15 terms enriched in weevils feeding on organically cultivated hosts. These  
495 included a highly interlinked set of acyl carrier proteins, which occurred in two different  
496 EnrichmentMaps with some modification (S2 Fig). The same network occurred again in immature  
497 tissue from citrus-citrus comparisons, as above but with the addition of two more GO terms (S2  
498 Fig).  
499

## 500 **Discussion**

501           Several arthropod species show transcriptional plasticity in response to different host plant  
502 profiles (9,46). In the same vein, this series of analyses sought to understand the processes of  
503 acclimation and adaptation to non-native host plants in two asexual *Naupactus* weevil species, as  
504 evidenced in their gene expression patterns.

505

### 506 **Taxing natal and novel host plants require highly specific transcriptional responses from** 507 **herbivores.**

508 **Legume and citrus host plants:** Because legumes contain nitrogen-fixing rhizobia and generally  
509 have diverse repertoires of chemical defenses, there is a strong evolutionary pressure on legume-  
510 feeding herbivores to overcome these defenses in order to derive nitrogen for their own nutrition  
511 (25). This can result in a demonstrable preference for legume hosts (18), even though these legume  
512 species tend to require more energy-intensive herbivore responses to overcome the host's defense  
513 response. Evidence of the extra cost imposed on legume-feeding weevils appears to be reflected  
514 in their gene expression profiles. The numbers of upregulated host detection genes, detoxification  
515 genes, and immune genes were significantly higher in legume-feeding weevils in both *N. cervinus*  
516 and *N. leucoloma* (Figs 1 and 2). This follows the prediction that both species invest more  
517 resources in detecting and dealing with secondary compounds of legumes, and that legumes elicit  
518 a larger immune response, possibly related to their associated rhizobia.

519           The identity of the overexpressed transcripts in legume-feeding weevils points to a legume-  
520 specific response. When examining both upregulated and downregulated host detection genes,  
521 detoxification genes, and immune genes, legume-feeding weevils had the highest number of  
522 unique differentially expressed transcripts (Fig 3i-ii), suggesting that the weevil's transcriptional



523 response pattern is highly specific to that host plant group. However, there were also strong  
524 overlaps in differentially expressed genes in comparisons between legume and other comparisons  
525 (Fig 3), suggesting that there are potentially shared mechanisms of responding to these particular  
526 host plants/growing conditions at the gene level. Previous work has hypothesized that host plant  
527 response specificity in herbivores may be exacerbated by the microbial communities specific to a  
528 host plant species, as ingesting microbes present on the leaf alters insect immunity (47). Adult  
529 *Naupactus* weevils feed on foliage and can encounter such leaf microbes.

530

531 **Organically cultivated host plants:** While the body of work contrasting transcriptional levels of  
532 defense compounds on conventional versus organic crops is not large, there is evidence that the  
533 production of some plant defensive compounds increases when plants are treated using organic  
534 rather than conventional approaches (48). Additionally, specific pathways related to RNA  
535 regulation and biotic stress have been found to be part of the variation in gene expression due to  
536 agricultural practices, with those pathways enhanced in organically fertilized or protected crops  
537 (49). In transcriptomes from weevils feeding on the same host species under different regimes of  
538 cultivation, there was a significantly higher quantity of upregulated host detection genes and  
539 specific categories of detoxification genes from weevils feeding on organically grown host plants  
540 (Fig 1b, Table 1). The expression intensity for differentially expressed immune genes was high  
541 across all three tissue types in both positive and negative directions (Fig 2). Taken as a whole,  
542 adult weevils feeding on organically raised hosts tend to elicit more upregulated genes in  
543 detoxification and host detection, with a slight trend in immune defense, supporting the hypothesis  
544 that organically cultivated host plants are associated with more differential gene regulation.

545           Even though organically raised host plants appear to challenge herbivores to a larger degree  
546 than their conventionally grown counterparts, the observed response in the three targeted gene  
547 categories is not unique to organically grown hosts. There was a notable overlap in the number of  
548 shared DEGs for host detection, detoxification and immune defense genes between Legume vs.  
549 Other and farming method comparisons (Fig 3). A greater degree of transcriptional plasticity and  
550 changes in genes associated with the metabolism of secondary compounds has been found as a  
551 response to exposure to stress in some aphids and other specialist insects (43,50). The evolution  
552 of a conserved mechanism for both more toxic host plants and exposure to other forms of stress  
553 would be the least evolutionarily costly (51), and would be especially beneficial for this  
554 polyphagous species.

555           The pathway-level response to feeding on organically grown host plants included enriched  
556 GO terms in oxidation/reduction pathways, potentially linked to oxidative stress responses (S2  
557 Fig). Transcripts involved in ribosome construction and translation are generally constitutively  
558 expressed, so it is interesting that our GO term analysis included these terms as significantly  
559 enriched. It may be the case that the enrichment of these terms points to an increase in translation  
560 of certain transcripts in response to xenobiotic compounds from resource-taxing host plants that  
561 require a change in weevil expression in basic metabolic pathways in order to clear these  
562 potentially life-threatening substances, as has been shown in *Helicoverpa armigera*, the  
563 polyphagous cotton bollworm (8).

564           Although the function of acyl carrier proteins in insect cells specifically is largely unknown  
565 (52), the uniquely citrus-specific enriched cluster of acyl carrier proteins found in organic-feeding  
566 weevils (Fig 4ii, S2iii Fig) is known to be linked to fatty acid biosynthesis and glycolytic pathways  
567 (53). This upregulation may indicate that the host plant defenses of organically treated oranges are

568 more stressful for herbivores than those of conventionally treated oranges. Similar results have  
569 been proposed as a clear link between exposure to stress and increased transcriptional plasticity,  
570 including regulation of transcription and translation processes (43).

571

572 **Short-term acclimation to a novel host plant:** The important contribution of *cytochrome P450s*  
573 to the success of herbivore establishment on novel host plants has been previously documented in  
574 spider mites (28). In our experimental host plant switch, numbers of upregulated *ABC transporter*,  
575 *cytochrome P450*, and *glutathione S-transferase* genes were significantly higher in the switch  
576 condition (Fig 1b, Table 1).

577 A possible interpretation of the bidirectional nature of the expression of immune genes (Fig  
578 2i) could be that the new host plant presents a new set of natural enemies, and as a herbivore feeds  
579 on a host where new natural enemies or parasites are present, immune genes associated with those  
580 pressures are regulated in one direction. Genes specific to the old host plant appear as regulated in  
581 the opposite direction, when in fact they may be simply maintained in weevils feeding on the old  
582 host relative to downregulation in weevils feeding on the new host. Support for the idea that  
583 herbivore detoxification and immune challenges are larger in newly colonized host plants is  
584 supported by the elevated herbivore diversity and load on native hosts relative to non-native hosts  
585 found in forty-seven different woody plant species (36).

586 While host detection and immune defense genes were entirely shared with other  
587 comparisons, a suite of 17 detoxification DEGs were uniquely specific to the Switch vs. Maintain  
588 contrasts (Fig 3). The length of host plant attenuation may explain the results described here; a  
589 host-plant specific set of detoxification genes may form the first line of short-term defense for a  
590 weevil introduced to a new host, as identified in spider mites challenged with new hosts of varying

591 degrees of similarity in terms of secondary metabolites (29). On the other hand, long-term  
592 attenuation to a host plant may occur through host plant detection and immune pathways over  
593 longer timescales without exhibiting or requiring short-term specificity. It is possible that the  
594 investment needed to differentially regulate immune and host detection genes may come later as a  
595 long-term adjustment, whereas detoxification genes are differentially regulated early on to ensure  
596 survival on that new host. This is supported by other work indicating that a generalist's short-term  
597 transcriptional response to a new host is detoxification-based, with the longer-term response  
598 including three times more differentially expressed genes across the genome (30).

599         Our results also present a set of 11 GO terms enriched exclusively in the switched weevils,  
600 providing a window into other pathways potentially involved in early acclimation to a new host  
601 plant. Some of these GO terms have been shown in other species to be highly variable and involved  
602 in stress responses to new environmental conditions (54). Other terms are implicated in the post-  
603 transcriptional regulation of mRNA maturation and export from the nucleus (55). This suggests  
604 that there are some upregulated GO terms related to responding to immediate environmental stress  
605 and the rapid adjustment of regulatory mechanisms that are enriched after a host plant transition.  
606 For parthenogenetic weevil species and other species with low genetic variation, an immediate  
607 response modulated by gene expression and epigenetic modification would be a useful way of  
608 acclimating quickly to new environmental conditions (56,57). More generally, other arthropod  
609 studies that have examined new and old host plant adaptations in polyphagous insects have  
610 reported distinct transcriptional plasticity patterns during acclimation to such hosts (9,29).

611

612 **Different modes of gene expression response: narrowly targeted vs. widespread**

613 Even though our focus species have the potential to be polyphagous (58), individual weevil  
614 populations produce larvae that drop from the foliage to burrow into the soil to feed on the same  
615 host plant roots, which may result in the transgenerational extension of a specific host plant  
616 preference, regardless of polyphagous ability. Because of this dichotomy between potential and  
617 actual diet breadths, the expression of host-related genes in these weevils could take divergent  
618 modalities. Their patterns of gene expression may manifest as a widespread regulation of several  
619 common genes, as expected in a generalist species, or as a specific and targeted regulation of a  
620 few highly host-specific genes, as expected in a specialist species (8).

621 Citrus hosts appeared to elicit a narrow, targeted expression response of host detection  
622 genes in weevils feeding on different species of citrus hosts (Fig 2ii). One explanation for the  
623 targeted expression of host detection genes for citrus is the phylogenetic closeness of the citrus  
624 hosts examined here. Further research that corrects for this potentially confounding variable would  
625 be productive for more concretely identifying the source of this effect. However, this trend in  
626 highly specific, targeted expression for citrus hosts is replicated in other comparisons, and this  
627 pattern may be the result of acclimation to the unique chemical defenses of the host clade as well.  
628 Some research has found that the consequences of transfer to a new related host versus a new,  
629 distantly related host utilizes similar pathways (29). Following this idea of specialist, targeted  
630 expression, weevils feeding on a novel host plant increased expression intensity, but not number,  
631 of host detection and immune genes; such a targeted response was only observed in head and  
632 abdominal tissue, and may constitute the first signs of acclimation to the new host (Fig 2i).

633 It is important to note that the within-family comparisons involved two weevil species,  
634 with legume-feeding *N. leucoloma* compared against aster-feeding and citrus-feeding *N. cervinus*.  
635 Thus, for this particular set of comparisons, differences may be due to species biology rather than

636 host plant attenuation. However, it is then interesting that host plant detection DEGs overlap  
637 entirely between two species feeding on legume and citrus host plants (Fig 3); either these species  
638 are very alike and the other results included in the host plant family analysis are credible, or the  
639 genes associated with host plant detection are highly conserved between species while the  
640 differentially expressed detoxification and immune defense genes have diverged. Host detection  
641 genes such as odorant-binding proteins are generally highly divergent between insect clades (Sun  
642 et al., 2018), suggesting that our results are probably due to genuine alterations in gene regulation  
643 patterns.

644         The contrasts between legume host plants show a pattern that appears to follow what would  
645 be expected for a generalist insect, with a high-intensity response involving large numbers of  
646 upregulated genes. This is particularly noticeable in detoxification genes, where the quantity of  
647 upregulated detoxification genes is significantly higher between weevils feeding on different  
648 legumes than in contrasts in the other two host plant groups (Fig 1b). Even though the modality  
649 of expression involving larger numbers of genes may appear like that of a generalist, the identity  
650 of the transcripts that are differentially expressed shows a large degree of specificity. Legume-  
651 feeding weevils had more total differentially expressed unique detoxification genes than either the  
652 citrus-feeding weevils or the aster-feeding (non-citrus, non-legume) weevils (Fig 3). This data  
653 supports the idea that observed differences in gene expression are highly dependent on the  
654 chemical characteristics of a specific host or plant family, or in this case, differences between  
655 members of the same host plant family. Legumes are not unique in eliciting specific defensive  
656 responses from herbivores; studies on Coleoptera and Lepidoptera feeding on Brassicaceae also  
657 respond specifically to the chemical defense profile of that host clade (60).

658

## 659 **Resource allocation and transgenerational gene expression effects**

660 Transgenerational, host quality-dependent effects have been observed in insect herbivores  
661 before, as parental modulation of offspring phenotype can better adapt that progeny to different  
662 host plant qualities (61).

663 The intensities of gene expression for detoxification and immune defense genes were  
664 particularly interesting in comparing transcriptomes between immatures derived from legume-  
665 feeding versus citrus-feeding parents. In this case, the intensity of expression was strong in both  
666 upregulated and downregulated immune and detoxification genes (Fig 2i), suggesting that there  
667 are different sets of immune and detoxification genes that are differentially expressed between the  
668 offspring of legume-feeding weevils and citrus-feeding weevils. Overexpression of *cytochrome*  
669 *P450s* in larval stages has been reported in other citrus-feeding arthropods, such as the citrus red  
670 mite, but the role of this major detoxification enzyme has been linked to resistance to insecticides  
671 rather than to citrus-specific defenses (62). Legumes have the unique potential for rhizobia-  
672 mediated augmentation of host plant defenses (38,63), and because of this, differences between  
673 immune gene regulation in legumes versus citrus were expected. However, this effect was only  
674 identifiable in immature tissue, which suggests that this pattern is potentially specific to this life  
675 stage.

676 From the GSEA results of weevils feeding on legumes versus non-legumes, it appears that  
677 GO terms associated with “ribosome assembly” and “nucleosomes” are enriched solely in adult  
678 tissues (Fig 4). The immature comparison yielded primarily downregulated gene sets, which may  
679 be the effect of resource allocation towards adult survival rather than host-priming of offspring  
680 (Fig 4). If the adult stage must dedicate its energy to surviving on a difficult host plant, previous  
681 research has suggested that this triggers the diversion of energetic resources away from

682 reproduction and towards survival (64,65), so that gene sets are less modulated in immatures from  
683 these adults relative to immatures from adults feeding on less well-defended host plants. In our  
684 experimental set-up, where immatures were processed before they were able to feed and therefore  
685 not yet exposed to the challenges presented by their host plants, the decreased parental investment  
686 in offspring priming would be more prominent. This would follow the above findings of generally  
687 higher numbers and combined expression indices of upregulated immune, detoxification, and host  
688 detection genes in adult weevils from both species that fed on legumes.

689         We see high expression intensity in immatures from parents feeding on organically raised  
690 host plants across all three gene groups, despite no significant difference in number of DEGs across  
691 these three categories, with the exception of HD genes (Fig 2). Because an organic host is not as  
692 difficult as a legume host, feeding on organic hosts allows for the parent to maintain any  
693 investment in reproduction and offspring host priming, rather than reallocating that energetic  
694 resource to immediate survival. The very low number of enriched gene sets in the immature  
695 comparison (S2iii Fig) from parents feeding on organically raised host plants could indicate that  
696 host plant cultivation may have less of an effect on regulation at the gene pathway level than host  
697 plant groups, as more enriched gene sets were observed in host plant group comparisons. Previous  
698 work has shown a highly specific gene response but common gene family response during a  
699 herbivore's long-term acclimation to a particular host plant (29), and the low number of enriched  
700 pathways but significant difference of DEG number and expression intensity in this set of  
701 comparisons may support this finding.

702         A set of 11 enriched GO terms exclusive to those weevils that have fed on a new host plant  
703 are found only in adult tissues. It appears that transgenerational effects at the pathway level are not  
704 generalized, although at the gene level, a small effect was observed for detoxification and immune



705 genes. This is surprising, because it would be reasonable to assume that any transgenerational  
706 transmission of the parent's acclimated phenotype specific to a new host plant could help the  
707 offspring be better poised to face those same conditions. Transgenerational effects of  
708 environmental conditions have been recorded in asexual collembolan species and sexually  
709 reproducing grass moths (24,66). However, it is also possible that a multi-pathway  
710 transgenerational enrichment may not be immediately needed, and that the more specific priming  
711 in the form of increased expression of specific detoxification and immune genes is enough of an  
712 advantage for offspring to survive.

713

#### 714 **Closing Remarks**

715         Our results have shown that the gene expression response of some *Naupactus* weevils can  
716 be specific to particular host plants, and that elements of that response can be transgenerational.  
717 Moreover, some host plant groups, such as legumes, appear to be more taxing to weevils as they  
718 elicit a complex gene expression response which is both strong in intensity and specific in identity.  
719 However, the weevil response to the secondary metabolites of taxing host plants shares many  
720 attributes (i.e., identity of upregulated transcript and enriched GO terms) with other stressful  
721 situations such as host plant cultivation conditions and/or a transition to a novel host, leading us to  
722 believe that there is an evolutionarily favorable core shared gene expression regime for responding  
723 to different types of stressful situations. Modulating gene expression in the absence of other  
724 avenues for phenotypic adaptation may be an important mechanism for successful host plant  
725 colonization for these introduced asexual insects.

## 726 **Experimental Procedures**

727

### 728 **Weevil collection and rearing**

729 Weevils were collected from Argentina in Buenos Aires and Entre Rios Provinces (7  
730 localities) and within the United States in Georgia, Florida, Alabama (6 localities), and California  
731 (4 localities) (S1 Table). Adult weevils were maintained in temperature-controlled environmental  
732 rooms with 12:12 dark/light cycles at 24-28°C and 50% humidity (after Tarrant and McCoy, 1989)  
733 for a three-week acclimation period. Each set of weevils was fed their natal host plant. Weevil  
734 rearing boxes were checked daily for eggs, and juvenile specimens were separated, allowed to  
735 develop for 7-10 days, and frozen before active feeding on plant matter began. Adults were  
736 processed three weeks after the acclimation period. For a set of experimental host switch trials,  
737 individual adults were randomly assigned to continue consuming their natal host or to switch to a  
738 novel host plant after the three-week acclimation period and processed after an additional three  
739 weeks.

740

### 741 **Sample preparation, RNA extraction, and quality control**

742 Adults and immature (larval) specimens were frozen and preserved in RNAlater  
743 (Invitrogen, Carlsbad, CA). RNA extraction was performed using the PureLink RNA Mini Kit  
744 (Ambion, Carlsbad, CA). To obtain enough RNA from adult tissues we extracted material from a  
745 pool of six weevils for the head and abdomen samples. To extract RNA from immature tissues,  
746 between 50 to 100 first instar larvae were pooled, also maintaining the parental host plant and  
747 locality of origin. RNA concentration and quality were assessed using a NanoDrop 2000  
748 spectrophotometer (ThermoFisher Scientific, Carlsbad, CA) and a Qubit™ 4 fluorometer

749 (Invitrogen, Carlsbad, CA). While a given tissue from a specimen pool representing a given  
750 locality was sequenced only once in this format, the differential expression analysis consists of  
751 comparisons of several of these pooled RNA samples.

752 RNA sequencing, transcriptome assembly, and initial GSEA results were completed by  
753 SeqMatic (Fremont, CA) from each of the 52 samples. The RNA-Seq libraries were compiled  
754 using the Illumina HiSeq 2500 platform (Illumina, San Diego, CA) and transcripts were assembled  
755 *de novo* using the R/Bioconductor (<http://bioconductor.org>) package `Trinity` (68) (data  
756 available in NCBI GEO, accession numbers...). Transcripts were mapped to identified/putative  
757 protein sequences in the UniProt database (<http://uniprot.org>), with the best hit used for transcript  
758 annotation and the assignment of gene ontology (GO) terms. Each sample transcriptome was  
759 aligned against an initial, arbitrary Trinity transcriptome assembly using the `bowtie` R package  
760 (69). The `RSEM` package (70) was used to calculate transcript and gene expression levels without  
761 the need for a reference genome.

762 Quality control measures were performed using FastQC (Illumina, San Diego, CA).  
763 Comparisons that included samples that were flagged during quality control analysis were not  
764 included (n=4), with the exception of two larval samples (Tul\_onetwoC1I1 and Tul\_threeC3I1),  
765 which were retained given that there were no replacements and the comparative paucity of  
766 immature samples. Only gene transcripts that had transcript counts of  $\geq 10$  in at least 1 sample were  
767 included for differential gene expression quantification. From 79,798 transcripts in *N. cervinus*  
768 samples, 54,366 genes were retained (68%); from 73,953 gene transcripts in *N. leucoloma* samples,  
769 37,982 genes were retained (51%).

770

771 **Data processing and visualization**

772 Gene expression levels were then assessed using FPKM and  $\log_2$ FC values. The fragments  
773 per kilobase of exon per million reads mapped (FPKM) is a normalized count value of the number  
774 of transcript fragments mapped onto a particular gene, corrected for the length of that gene and the  
775 sequencing depth. The  $\log_2$ -fold change in expression levels between the two groups of samples  
776 compared ( $\log_2$ FC) gives a relative measure of over- or under-expression for the sample groups  
777 being compared. For this analysis, a mapped gene was considered a differentially expressed gene  
778 (DEG) if the  $\Delta$ FPKM was  $> 1$  and the  $\log_2$ FC value was  $\geq 1$ , indicating upregulation, or  $\leq -1$ ,  
779 indicating downregulation. All graphing was performed in RStudio v. 3.6.1 (see S4 Table) (71).

780

### 781 **Differential gene expression comparisons**

782 Fifty-five individual samples were included in 48 pairwise comparisons (S2 Table).  
783 Although we did not sequence each sample multiple times, we obtained replicates by analyzing  
784 samples from similar tissues and host plants together, albeit from different localities. In particular,  
785 samples that fell into similar categories of tissue, host plant, plant family, plant farming method,  
786 or those maintained on the natal host plant or switched to a novel host plant were analyzed together  
787 in groups of varying sizes (1-7 samples per group), effectively acting as replicates. The expression  
788 levels between groups of samples were compared in a pairwise fashion. Both *N. cervinus* and *N.*  
789 *leucoloma* samples originating from native and introduced ranges were included when available  
790 but analyzed separately.

791

### 792 **Assessing upregulation in three targeted gene categories**

793 To examine the role of IM, DTX, and HD gene regulation among host plant types and other  
794 conditions, composite violin/beeswarm DEG plots were constructed to visualize the number of

795 differentially upregulated genes in categories of host detection genes (*odorant binding proteins,*  
796 *chemosensory proteins, gustatory proteins*), detoxification genes (*cytochrome P450s, glutathione*  
797 *S-transferases, glutathione peroxidases, ABC transporters, carboxylesterases, UDP-*  
798 *glycosyltransferases*) and immune defense genes (serine proteases/proteinases and serpins  
799 modulating the immune defense cascade, general immune response-related gene identities) in the  
800 pairwise comparisons used in each set. These were grouped by host plant, host plant family, plant  
801 farming method, or host switch condition (see Results), and broken into functional gene groups as  
802 defined above, as well as by tissue type. To analyze differential gene expression of a transcript  
803 with a certain functional annotation (i.e. odorant-binding protein, a host detection gene), the  
804 transcript must be present in both groups in a comparison. In cases where a transcript is annotated  
805 for a function of interest in one group (i.e. legume-feeding weevils in a Legume vs. Other  
806 comparison) but is not identified in the counterpart group (i.e. weevils feeding on other hosts in a  
807 Legume vs. Other comparison), the differential expression of that gene product is not able to be  
808 determined and is therefore excluded from the consequent violin plot, generating a different  
809 number of data points for each functional annotation within a plot. This does not exclude that  
810 comparison pair from being plotted for differential expression of other host detection genes (i.e.  
811 chemosensory proteins). The detoxification gene group was analyzed as both aggregate data, by  
812 summing the total number of upregulated genes in each condition, and separately by identity, by  
813 producing a violin plot that retained the gene's functional identity information. To examine the  
814 potential interactions of sampled tissue type and functional gene group on the weevils' expression  
815 response to different host plants, a rank-based nonparametric ANOVA was performed using the R  
816 package `Rfit` for each comparison group. If the interaction between a pair of variables was

817 significant at  $\alpha=0.05$ , the effect of the interaction was considered an influence on the distribution  
818 of the number of overexpressed genes in each comparison.

819

### 820 **Weighted expression heatmaps considering intensity of expression and number of** 821 **differentially upregulated genes**

822 Heatmaps were constructed to compare the weighted median intensity of expression (using  
823  $\log_2FC$  values) in either direction for the three gene groups of interest. For each set of comparisons,  
824 DEGs falling into HD, DTX, or IM groups were separated, and  $\log_2FC$  ranges calculated separately  
825 for both positive and negative expression levels for each of those three gene groups. Comparisons  
826 that returned only one significantly upregulated or downregulated transcript in a gene group were  
827 excluded. These six expression range values (positive HD, negative HD, positive DTX, negative  
828 DTX, positive IM, and negative IM) were each split into five equal bins based on the range of  
829 expression values. This allowed the calculation of a median expression intensity, weighted by the  
830 number of genes in each bin, for both positive and negative expression in each of the three gene  
831 groups for each comparison. These weighted median expression intensities were then assembled  
832 into a heatmap and separated by tissue type for each comparison group.

833 Venn diagrams were employed to explore the number of shared or uniquely differentially  
834 expressed gene identities between comparisons. The same dataset used to build the plots for  
835 numbers of upregulated genes was used, separating by transcript identity between comparisons  
836 and retaining genes that are differentially expressed in either direction for HD, DTX, and IM genes.  
837 DEG specificity was visualized in a three-way or four-way Venn diagram, according to the  
838 comparison groups being tested.

839

840 **Exploration of global expression changes specific to particular host plants or experimental**  
841 **conditions**

842       As *N. cervinus* and *N. leucoloma* are not model organisms, a preliminary investigation of  
843 global expression patterns associated with host plant use was also performed using Gene Set  
844 Enrichment Analysis (GSEA) (72). GSEA identifies functionally enriched pathways and/or  
845 families of genes for each comparison, producing a gene ontology (GO) term associated with each  
846 of these gene families/sets. Each of these sets are assigned an enrichment score, which indicates  
847 the degree to which the component genes of a gene set are overrepresented in that sample. This is  
848 normalized to ameliorate differences in gene set size, as some gene families are bigger or more  
849 researched than others, as well as differences in expression depth. Finally, a false discovery rate  
850 (FDR) is calculated to control for multiple testing and false positive errors.

851

852 **Network-based visualization of gene set enrichment patterns across all gene categories**

853       To explore the relationships between these upregulated or downregulated enriched gene  
854 sets, a hierarchical clustering analysis of gene ontology terms was performed using the Cytoscape  
855 module EnrichmentMap (Cytoscape, v. 3.7.2) (73). Seventeen comparisons with the largest  
856 available sample sizes for each tissue class were selected to assemble EnrichmentMaps. Only gene  
857 sets with a false discovery rate (FDR) of  $< 0.05$  and a  $\log_2FC > 1$  were included to evaluate  
858 expression differences (74,75). Cytoscape parameters were set so that  $q = 0.05$ , and the default  
859 connectivity level was employed. The gene set list files compiled from the initial transcriptome  
860 assembly for each species were used as references. This method of visualization allows for  
861 interpretation of overlaps between different GO terms/gene sets for a gene network-oriented  
862 analysis of regulation patterns at a global level, with stringent selective criteria. To examine

863 differences and similarities in gene set enrichment between hosts and hypotheses, Venn diagrams  
864 were constructed, in this case separating GO terms by enrichment direction (positive or negative).

865  
866

## 867 **Acknowledgements**

868 We gratefully acknowledge the logistical support of Russ Mizzel from the NFREC-Quincy, FL,  
869 of Russell Ottens from the University of Georgia, and of Elizabeth Grafton-Cardwell and Joshua  
870 Reger from the Lindcove Research and Extension Center, University of California. We also greatly  
871 benefited from the guidance and field support of personnel at the USDA-ARS Appalachian Fruit  
872 Research Station, West Virginia, the USDA Southeastern Fruit and Tree Nut Research Laboratory  
873 in Georgia, the IFAS Extension, University of Florida in Homestead, Florida, the Florida  
874 Department of Agriculture and Consumer Services in Gainesville, Florida, and the Auburn  
875 University Gulf Coast and Chilton Research and Extension Centers in Alabama. Field assistance  
876 was provided by M. Koniger, J., M. and A. Rosado. J. Gums and C. Hou provided laboratory  
877 assistance.

878

879

880

881



882

## 883 References

884

- 885 1. Tobin PC. Managing invasive species. *F1000Res* [Internet]. 2018 Oct 23 [cited 2020 Jan  
886 13];7. Available from: <https://www.ncbi.nlm.nih.gov/pmc/articles/PMC6206619/>
- 887 2. Snell-Rood EC. Costs of Learning. In: Choe JC, editor. *Encyclopedia of Animal Behavior*  
888 (Second Edition) [Internet]. Oxford: Academic Press; 2017 [cited 2020 Jan 23]. p. 290–4.  
889 Available from: <http://www.sciencedirect.com/science/article/pii/B9780128096338012231>
- 890 3. Baker HG. Characteristics and modes of origin of weeds. *Characteristics and modes of*  
891 *origin of weeds* [Internet]. 1965 [cited 2020 Jan 18];147–72. Available from:  
892 <https://www.cabdirect.org/cabdirect/abstract/19682301817>
- 893 4. Lee KA, Klasing KC. A role for immunology in invasion biology. *Trends in Ecology &*  
894 *Evolution* [Internet]. 2004 Oct [cited 2019 Oct 8];19(10):523–9. Available from:  
895 <https://linkinghub.elsevier.com/retrieve/pii/S0169534704002095>
- 896 5. Ali JG, Agrawal AA. Specialist versus generalist insect herbivores and plant defense.  
897 *Trends in Plant Science* [Internet]. 2012 May 1 [cited 2020 Jan 13];17(5):293–302.  
898 Available from: <http://www.sciencedirect.com/science/article/pii/S1360138512000441>
- 899 6. Banerjee AK, Guo W, Huang Y. Genetic and epigenetic regulation of phenotypic variation  
900 in invasive plants – linking research trends towards a unified framework. *NeoBiota*  
901 [Internet]. 2019 Aug 19 [cited 2020 Jan 14];49:77–103. Available from:  
902 <https://neobiota.pensoft.net/article/33723/>
- 903 7. Hardy NB, Peterson DA, Ross L, Rosenheim JA. Does a plant-eating insect’s diet govern  
904 the evolution of insecticide resistance? Comparative tests of the pre-adaptation hypothesis.  
905 *Evolutionary Applications* [Internet]. 2018 [cited 2020 Oct 24];11(5):739–47. Available  
906 from: <https://onlinelibrary.wiley.com/doi/abs/10.1111/eva.12579>
- 907 8. Vogel H, Musser RO, Celorio-Mancera M de la P. Transcriptome Responses in  
908 Herbivorous Insects Towards Host Plant and Toxin Feeding. In: *Annual Plant Reviews*  
909 online [Internet]. American Cancer Society; 2014 [cited 2019 Oct 3]. p. 197–233. Available  
910 from: <https://onlinelibrary.wiley.com/doi/abs/10.1002/9781119312994.apr0510>
- 911 9. Celorio-Mancera M de la P, Wheat CW, Vogel H, Söderlind L, Janz N, Nylin S.  
912 Mechanisms of macroevolution: polyphagous plasticity in butterfly larvae revealed by  
913 RNA-Seq. *Molecular Ecology* [Internet]. 2013 [cited 2020 Jan 13];22(19):4884–95.  
914 Available from: <https://onlinelibrary.wiley.com/doi/abs/10.1111/mec.12440>
- 915 10. Näsvalld K, Wiklund C, Mrazek V, Künstner A, Talla V, Busch H, et al. Host plant diet  
916 affects growth and induces altered gene expression and microbiome composition in the  
917 wood white (*Leptidea sinapis*) butterfly. *Molecular Ecology* [Internet]. 2020 [cited 2020  
918 Dec 12];n/a(n/a). Available from:  
919 <https://onlinelibrary.wiley.com/doi/abs/10.1111/mec.15745>
- 920 11. Lanteri AA, Normark BB. Parthenogenesis in the Tribe Naupactini (Coleoptera:  
921 Curculionidae). *Ann Entomol Soc Am* [Internet]. 1995 Nov 1 [cited 2020 Jan  
922 13];88(6):722–31. Available from: <https://academic.oup.com/aesa/article/88/6/722/162605>
- 923 12. Normark BB, Johnson NA. Niche explosion. *Genetica* [Internet]. 2011 May [cited 2020 Jan  
924 17];139(5):551–64. Available from: <http://link.springer.com/10.1007/s10709-010-9513-5>
- 925 13. Suomalainen E. Significance of Parthenogenesis in the Evolution of Insects. *Annual*  
926 *Review of Entomology* [Internet]. 1962 [cited 2020 Jan 10];7(1):349–66. Available from:  
927 <https://doi.org/10.1146/annurev.en.07.010162.002025>

- 928 14. Del Río MG, Rodriguero MS, Confalonieri VA, Lanteri AA. Molecular and Morphological  
929 Phylogenetic Analysis of Naupactus Dejean (Curculionidae: Entiminae) and Allied Genera:  
930 The Dilemma of Classification. Diversity [Internet]. 2018 Sep [cited 2020 Jan 19];10(3):59.  
931 Available from: <https://www.mdpi.com/1424-2818/10/3/59>
- 932 15. Lanteri A, Marvaldi A. Graphognathus Buchanan, a new synonym of Naupactus Dejean,  
933 and systematics of the *N. leucoloma* species group (Coleoptera: Curculionidae). The  
934 Coleopterists Bulletin. 1995 Jan 1;49:206–28.
- 935 16. Lanteri AA, Rio MGD. Phylogeny of the tribe Naupactini (Coleoptera: Curculionidae)  
936 based on morphological characters. Systematic Entomology [Internet]. 2017 [cited 2021 Jan  
937 10];42(2):429–47. Available from:  
938 [https://www.academia.edu/33247471/Phylogeny\\_of\\_the\\_tribe\\_Naupactini\\_Coleoptera\\_Curculionidae\\_based\\_on\\_morphological\\_characters](https://www.academia.edu/33247471/Phylogeny_of_the_tribe_Naupactini_Coleoptera_Curculionidae_based_on_morphological_characters)
- 940 17. Vepsäläinen K, Järvinen O. Apomictic Parthenogenesis and the Pattern of the Environment.  
941 Am Zool [Internet]. 1979 Aug [cited 2020 Jan 10];19(3):739–51. Available from:  
942 <https://academic.oup.com/icb/article-lookup/doi/10.1093/icb/19.3.739>
- 943 18. Logan DP, Maher BJ, Dobson SS, Connolly PG. Larval Survival of Fuller’s Rose Weevil,  
944 *Naupactus cervinus*, on Common Groundcover Species in Orchards of New Zealand  
945 Kiwifruit. J Insect Sci [Internet]. 2008 Sep 10 [cited 2020 Jan 10];8. Available from:  
946 <https://www.ncbi.nlm.nih.gov/pmc/articles/PMC3127418/>
- 947 19. Rodriguero MS, Lanteri AA, Guzmán NV, Guedes JVC, Confalonieri VA. Out of the  
948 forest: past and present range expansion of a parthenogenetic weevil pest, or how to  
949 colonize the world successfully. Ecology and Evolution [Internet]. 2016 [cited 2019 Oct  
950 3];6(15):5431–45. Available from:  
951 <https://onlinelibrary.wiley.com/doi/abs/10.1002/ece3.2180>
- 952 20. Sites RW, Thorvilson HG. The First Records of the Whitefringed Beetle, *Graphognathus*  
953 *leucoloma* (Coleoptera: Curculionidae), in New Mexico and Texas. The Florida  
954 Entomologist [Internet]. 1988 [cited 2020 Jan 13];71(4):657–9. Available from:  
955 <https://www.jstor.org/stable/3495025>
- 956 21. Lanteri A, Bigolin M, del Río M, Guedes J. On the Presence of Five Species of Naupactini  
957 (Coleoptera: Curculionidae) Damaging Soybean in Brazil. Neotropical entomology. 2013  
958 Jun 1;42:325–7.
- 959 22. Lanteri A, Guedes J, Parra JR. Weevils Injurious for Roots of Citrus in São Paulo State,  
960 Brazil. Neotropical Entomology. 2002 Oct 1;31.
- 961 23. Greer EL, Maures TJ, Ucar D, Hauswirth AG, Mancini E, Lim JP, et al. Transgenerational  
962 epigenetic inheritance of longevity in *Caenorhabditis elegans*. Nature [Internet]. 2011 Nov  
963 [cited 2020 Nov 28];479(7373):365–71. Available from:  
964 <https://www.nature.com/articles/nature10572>
- 965 24. Hafer N, Ebil S, Uller T, Pike N. Transgenerational effects of food availability on age at  
966 maturity and reproductive output in an asexual collembolan species. Biol Lett [Internet].  
967 2011 Oct 23 [cited 2020 Nov 15];7(5):755–8. Available from:  
968 <https://www.ncbi.nlm.nih.gov/pmc/articles/PMC3169046/>
- 969 25. Schoville SD, Chen YH, Andersson MN, Benoit JB, Bhandari A, Bowsher JH, et al. A  
970 model species for agricultural pest genomics: the genome of the Colorado potato beetle,  
971 *Leptinotarsa decemlineata* (Coleoptera: Chrysomelidae). Sci Rep [Internet]. 2018 Dec  
972 [cited 2019 Oct 3];8(1):1931. Available from: [http://www.nature.com/articles/s41598-018-](http://www.nature.com/articles/s41598-018-20154-1)  
973 20154-1

- 974 26. Simon J-C, d'Alençon E, Guy E, Jacquin-Joly E, Jaquiéry J, Nouhaud P, et al. Genomics of  
975 adaptation to host-plants in herbivorous insects. *Brief Funct Genomics*. 2015  
976 Nov;14(6):413–23.
- 977 27. Li S-S, Yan Z-C, Zhao J-J, Li Y-X. Transcriptomic analyses of chemosensory genes in  
978 *Trichogramma japonicum* (Hymenoptera: Trichogrammatidae). *Comparative Biochemistry*  
979 *and Physiology Part D: Genomics and Proteomics* [Internet]. 2021 Mar 1 [cited 2020 Dec  
980 12];37:100755. Available from:  
981 <http://www.sciencedirect.com/science/article/pii/S1744117X20301027>
- 982 28. Agrawal AA, Vala F, Sabelis MW. Induction of Preference and Performance after  
983 Acclimation to Novel Hosts in a Phytophagous Spider Mite: Adaptive Plasticity? *The*  
984 *American Naturalist* [Internet]. 2002 May 1 [cited 2020 Apr 1];159(5):553–65. Available  
985 from: <https://www.journals.uchicago.edu/doi/abs/10.1086/339463>
- 986 29. Snoeck S, Wybouw N, Leeuwen TV, Dermauw W. Transcriptomic Plasticity in the  
987 Arthropod Generalist *Tetranychus urticae* Upon Long-Term Acclimation to Different Host  
988 Plants. *G3: Genes, Genomes, Genetics* [Internet]. 2018 Dec 1 [cited 2019 Oct  
989 18];8(12):3865–79. Available from: <https://www.g3journal.org/content/8/12/3865>
- 990 30. Dermauw W, Wybouw N, Rombauts S, Menten B, Vontas J, Grbić M, et al. A link between  
991 host plant adaptation and pesticide resistance in the polyphagous spider mite *Tetranychus*  
992 *urticae*. *PNAS* [Internet]. 2013 Jan 8 [cited 2020 Apr 1];110(2):E113–22. Available from:  
993 <https://www.pnas.org/content/110/2/E113>
- 994 31. Heckel DG. Insect Detoxification and Sequestration Strategies. In: *Annual Plant Reviews*  
995 online [Internet]. American Cancer Society; 2018 [cited 2020 Oct 24]. p. 77–114. Available  
996 from: <https://onlinelibrary.wiley.com/doi/abs/10.1002/9781119312994.apr0507>
- 997 32. Scanlan JL, Gledhill-Smith RS, Battlay P, Robin C. Identifying candidate detoxification  
998 genes in the ecdysteroid kinase-like (EckL) and cytochrome P450 gene families in  
999 *Drosophila melanogaster* by integrating evolutionary and transcriptomic data. *bioRxiv*  
1000 [Internet]. 2020 Feb 19 [cited 2020 Oct 24];2020.02.17.951962. Available from:  
1001 <https://www.biorxiv.org/content/10.1101/2020.02.17.951962v1>
- 1002 33. Barthel A, Kopka I, Vogel H, Zipfel P, Heckel DG, Groot AT. Immune defence strategies  
1003 of generalist and specialist insect herbivores. *Proceedings of the Royal Society B:*  
1004 *Biological Sciences* [Internet]. 2014 Aug 7 [cited 2019 Oct 3];281(1788):20140897.  
1005 Available from: <https://royalsocietypublishing.org/doi/full/10.1098/rspb.2014.0897>
- 1006 34. Vogelweith F, Thiéry D, Quaglietti B, Moret Y, Moreau J. Host plant variation plastically  
1007 impacts different traits of the immune system of a phytophagous insect. *Functional Ecology*  
1008 [Internet]. 2011 [cited 2019 Oct 3];25(6):1241–7. Available from:  
1009 <https://besjournals.onlinelibrary.wiley.com/doi/abs/10.1111/j.1365-2435.2011.01911.x>
- 1010 35. Smilanich AM, Vargas J, Dyer LA, Bowers MD. Effects of Ingested Secondary Metabolites  
1011 on the Immune Response of a Polyphagous Caterpillar *Grammia incorrupta*. *J Chem Ecol*  
1012 [Internet]. 2011 Mar 1 [cited 2019 Oct 8];37(3):239–45. Available from:  
1013 <https://doi.org/10.1007/s10886-011-9924-5>
- 1014 36. Meijer K, Zemel H, Chiba S, Smit C, Beukeboom LW, Schilthuizen M. Phytophagous  
1015 Insects on Native and Non-Native Host Plants: Combining the Community Approach and  
1016 the Biogeographical Approach. *PLOS ONE* [Internet]. 2015 May 8 [cited 2020 Jan  
1017 14];10(5):e0125607. Available from:  
1018 <https://journals.plos.org/plosone/article?id=10.1371/journal.pone.0125607>
- 1019 37. Wink M. Evolution of secondary metabolites in legumes (Fabaceae). *South African Journal*

- 1020 of Botany [Internet]. 2013 Nov 1 [cited 2020 Jan 13];89:164–75. Available from:  
1021 <http://www.sciencedirect.com/science/article/pii/S0254629913002858>
- 1022 38. Dean JM, Mescher MC, De Moraes CM. Plant Dependence on Rhizobia for Nitrogen  
1023 Influences Induced Plant Defenses and Herbivore Performance. *International Journal of*  
1024 *Molecular Sciences* [Internet]. 2014 Jan [cited 2019 Oct 3];15(1):1466–80. Available from:  
1025 <https://www.mdpi.com/1422-0067/15/1/1466>
- 1026 39. Hardwick S, Prestidge RA. Effects of Whitefringed Weevil Larval Feeding on Ryegrass  
1027 and White Clover in the Laboratory. In 1996.
- 1028 40. Lv X, Zhao S, Ning Z, Zeng H, Shu Y, Tao O, et al. Citrus fruits as a treasure trove of  
1029 active natural metabolites that potentially provide benefits for human health. *Chemistry*  
1030 *Central Journal* [Internet]. 2015 Dec 24 [cited 2020 Jan 13];9(1):68. Available from:  
1031 <https://doi.org/10.1186/s13065-015-0145-9>
- 1032 41. Wang S, Yang C, Tu H, Zhou J, Liu X, Cheng Y, et al. Characterization and Metabolic  
1033 Diversity of Flavonoids in Citrus Species. *Sci Rep* [Internet]. 2017 Sep 5 [cited 2020 Jan  
1034 13];7(1):1–10. Available from: <https://www.nature.com/articles/s41598-017-10970-2>
- 1035 42. Letourneau DK, Goldstein B. Pest damage and arthropod community structure in organic  
1036 vs. conventional tomato production in California. *Journal of Applied Ecology* [Internet].  
1037 2001 [cited 2020 Jan 13];38(3):557–70. Available from:  
1038 <https://besjournals.onlinelibrary.wiley.com/doi/abs/10.1046/j.1365-2664.2001.00611.x>
- 1039 43. Birnbaum SSL, Abbot P. Trans-generational transcriptomic response to natural variation in  
1040 host plant toxicity and insecticides in a specialist insect. *bioRxiv* [Internet]. 2019 Feb 5  
1041 [cited 2020 Apr 1];541904. Available from:  
1042 <https://www.biorxiv.org/content/10.1101/541904v1>
- 1043 44. Jia S, Li Y, Dai X, Li X, Zhou Y, Xu Y, et al. Physiological adaptations to sugar-mimic  
1044 alkaloids: Insights from *Bombyx mori* for long-term adaption and short-term response.  
1045 *Ecology and Evolution* [Internet]. 2020 [cited 2020 Dec 12];10(18):9682–95. Available  
1046 from: <https://onlinelibrary.wiley.com/doi/abs/10.1002/ece3.6574>
- 1047 45. Peel AD. The evolution of developmental gene networks: lessons from comparative studies  
1048 on holometabolous insects. *Philosophical Transactions of the Royal Society B: Biological*  
1049 *Sciences* [Internet]. 2008 Apr 27 [cited 2020 Jan 14];363(1496):1539–47. Available from:  
1050 <https://royalsocietypublishing.org/doi/10.1098/rstb.2007.2244>
- 1051 46. Christodoulides N, Dam ARV, Peterson DA, Frandsen RJN, Mortensen UH, Petersen B, et  
1052 al. Gene expression plasticity across hosts of an invasive scale insect species. *PLOS ONE*  
1053 [Internet]. 2017 May 4 [cited 2020 Jan 14];12(5):e0176956. Available from:  
1054 <https://journals.plos.org/plosone/article?id=10.1371/journal.pone.0176956>
- 1055 47. Yoon SA, Harrison JG, Philbin CS, Dodson CD, Jones DM, Wallace IS, et al. Host plant-  
1056 dependent effects of microbes and phytochemistry on the insect immune response.  
1057 *Oecologia* [Internet]. 2019 Sep 1 [cited 2020 Apr 1];191(1):141–52. Available from:  
1058 <https://doi.org/10.1007/s00442-019-04480-3>
- 1059 48. Mitchell AE, Hong Y-J, Koh E, Barrett DM, Bryant DE, Denison RF, et al. Ten-Year  
1060 Comparison of the Influence of Organic and Conventional Crop Management Practices on  
1061 the Content of Flavonoids in Tomatoes. *J Agric Food Chem* [Internet]. 2007 Jul 1 [cited  
1062 2020 Apr 3];55(15):6154–9. Available from: <https://doi.org/10.1021/jf070344+>
- 1063 49. van Dijk JP, Cankar K, Hendriksen PJM, Beenen HG, Zhu M, Scheffer S, et al. The  
1064 identification and interpretation of differences in the transcriptomes of organically and  
1065 conventionally grown potato tubers. *J Agric Food Chem*. 2012 Mar 7;60(9):2090–101.

- 1066 50. Zhu F, Moural TW, Nelson DR, Palli SR. A specialist herbivore pest adaptation to  
1067 xenobiotics through up-regulation of multiple Cytochrome P450s. *Scientific Reports*  
1068 [Internet]. 2016 Feb 10 [cited 2020 Apr 1];6(1):1–10. Available from:  
1069 <https://www.nature.com/articles/srep20421>
- 1070 51. Gassmann AJ, Onstad DW, Pittendrigh BR. Evolutionary analysis of herbivorous insects in  
1071 natural and agricultural environments. *Pest Management Science* [Internet]. 2009 [cited  
1072 2020 Apr 1];65(11):1174–81. Available from:  
1073 <https://onlinelibrary.wiley.com/doi/abs/10.1002/ps.1844>
- 1074 52. Stanley-Samuelson DW, Jurenka RA, Cripps C, Blomquist GJ, Renobales M de. Fatty acids  
1075 in insects: Composition, metabolism, and biological significance. *Archives of Insect*  
1076 *Biochemistry and Physiology* [Internet]. 1988 [cited 2020 Nov 8];9(1):1–33. Available  
1077 from: <https://onlinelibrary.wiley.com/doi/abs/10.1002/arch.940090102>
- 1078 53. Byers DM, Gong H. Acyl carrier protein: structure-function relationships in a conserved  
1079 multifunctional protein family. *Biochem Cell Biol*. 2007 Dec;85(6):649–62.
- 1080 54. Azaiez A, Pavy N, Gérardi S, Laroche J, Boyle B, Gagnon F, et al. A catalog of annotated  
1081 high-confidence SNPs from exome capture and sequencing reveals highly polymorphic  
1082 genes in Norway spruce (*Picea abies*). *BMC Genomics* [Internet]. 2018 Dec 17 [cited 2020  
1083 Nov 15];19. Available from: <https://www.ncbi.nlm.nih.gov/pmc/articles/PMC6296092/>
- 1084 55. Mangus DA, Evans MC, Jacobson A. Poly(A)-binding proteins: multifunctional scaffolds  
1085 for the post-transcriptional control of gene expression. *Genome Biology* [Internet]. 2003 Jul  
1086 1 [cited 2020 Nov 15];4(7):223. Available from: <https://doi.org/10.1186/gb-2003-4-7-223>
- 1087 56. Preite V, Snoek LB, Oplaat C, Biere A, Putten WH van der, Verhoeven KJF. The  
1088 epigenetic footprint of poleward range-expanding plants in apomictic dandelions.  
1089 *Molecular Ecology* [Internet]. 2015 [cited 2020 Nov 28];24(17):4406–18. Available from:  
1090 <https://onlinelibrary.wiley.com/doi/abs/10.1111/mec.13329>
- 1091 57. Richards CL, Schrey AW, Pigliucci M. Invasion of diverse habitats by few Japanese  
1092 knotweed genotypes is correlated with epigenetic differentiation. Vellend M, editor. *Ecol*  
1093 *Lett* [Internet]. 2012 Sep [cited 2020 Nov 15];15(9):1016–25. Available from:  
1094 <http://doi.wiley.com/10.1111/j.1461-0248.2012.01824.x>
- 1095 58. Marvaldi AE, Sequeira AS, O'Brien CW, Farrell BD. Molecular and Morphological  
1096 Phylogenetics of Weevils (Coleoptera, Curculionoidea): Do Niche Shifts Accompany  
1097 Diversification? *Syst Biol* [Internet]. 2002 Sep 1 [cited 2019 Oct 8];51(5):761–85.  
1098 Available from: <https://academic.oup.com/sysbio/article/51/5/761/1678476>
- 1099 59. Sun JS, Xiao S, Carlson JR. The diverse small proteins called odorant-binding proteins.  
1100 *Open Biology* [Internet]. 2018 [cited 2020 Nov 21];8(12):180208. Available from:  
1101 <https://royalsocietypublishing.org/doi/10.1098/rsob.180208>
- 1102 60. Frenzel M, Brandl R. Diversity and abundance patterns of phytophagous insect  
1103 communities on alien and native host plants in the Brassicaceae. *Ecography* [Internet]. 2003  
1104 [cited 2020 Jan 14];26(6):723–30. Available from:  
1105 <https://onlinelibrary.wiley.com/doi/abs/10.1111/j.0906-7590.2003.03649.x>
- 1106 61. Cahenzli F, Erhardt A. Transgenerational acclimatization in an herbivore–host plant  
1107 relationship. *Proc Biol Sci* [Internet]. 2013 Apr 7 [cited 2020 Apr 19];280(1756). Available  
1108 from: <https://www.ncbi.nlm.nih.gov/pmc/articles/PMC3574377/>
- 1109 62. Ding T-B, Niu J-Z, Yang L-H, Zhang K, Dou W, Wang J-J. Transcription profiling of two  
1110 cytochrome P450 genes potentially involved in acaricide metabolism in citrus red mite  
1111 *Panonychus citri*. *Pesticide Biochemistry and Physiology* [Internet]. 2013 May 1 [cited

- 1112 2020 Nov 28];106(1):28–37. Available from:  
1113 <http://www.sciencedirect.com/science/article/pii/S0048357513000539>
- 1114 63. Pineda A, Zheng S-J, van Loon JJA, Pieterse CMJ, Dicke M. Helping plants to deal with  
1115 insects: the role of beneficial soil-borne microbes. *Trends in Plant Science* [Internet]. 2010  
1116 Sep 1 [cited 2020 Apr 3];15(9):507–14. Available from:  
1117 <http://www.sciencedirect.com/science/article/pii/S1360138510001007>
- 1118 64. Awmack C, Leather S. Host plant quality and fecundity in herbivorous insects. *Annual*  
1119 *review of entomology*. 2002 Feb 1;47:817–44.
- 1120 65. Ohgushi T. A reproductive tradeoff in an herbivorous lady beetle: egg resorption and  
1121 female survival. *Oecologia* [Internet]. 1996 May 1 [cited 2020 Apr 1];106(3):345–51.  
1122 Available from: <https://doi.org/10.1007/BF00334562>
- 1123 66. Zhong H, Li F, Chen J, Zhang J, Li F. Comparative transcriptome analysis reveals host-  
1124 associated differentiation in *Chilo suppressalis* (Lepidoptera: Crambidae). *Sci Rep*  
1125 [Internet]. 2017 Oct 23 [cited 2020 Jan 14];7. Available from:  
1126 <https://www.ncbi.nlm.nih.gov/pmc/articles/PMC5653757/>
- 1127 67. Tarrant CA, McCoy CW. Effect of Temperature and Relative Humidity on the Egg and  
1128 Larval Stages of Some Citrus Root Weevils. *The Florida Entomologist* [Internet]. 1989  
1129 [cited 2020 Oct 24];72(1):117–23. Available from: <https://www.jstor.org/stable/3494976>
- 1130 68. Haas BJ, Papanicolaou A, Yassour M, Grabherr M, Blood PD, Bowden J, et al. *De novo*  
1131 transcript sequence reconstruction from RNA-seq using the Trinity platform for reference  
1132 generation and analysis. *Nature Protocols* [Internet]. 2013 Aug [cited 2020 Mar  
1133 11];8(8):1494–512. Available from: <https://www.nature.com/articles/nprot.2013.084>
- 1134 69. Langmead B, Trapnell C, Pop M, Salzberg SL. Ultrafast and memory-efficient alignment of  
1135 short DNA sequences to the human genome. *Genome Biology* [Internet]. 2009 Mar 4 [cited  
1136 2020 Mar 20];10(3):R25. Available from: <https://doi.org/10.1186/gb-2009-10-3-r25>
- 1137 70. Li B, Dewey CN. RSEM: accurate transcript quantification from RNA-Seq data with or  
1138 without a reference genome. *BMC Bioinformatics* [Internet]. 2011 Aug 4 [cited 2020 Mar  
1139 11];12(1):323. Available from: <https://doi.org/10.1186/1471-2105-12-323>
- 1140 71. R Core Team. R: A language and environment for statistical computing. [Internet]. Vienna,  
1141 Austria: R Foundation for Statistical Computing; 2019. Available from: [https://www.R-](https://www.R-project.org/)  
1142 [project.org/](https://www.R-project.org/)
- 1143 72. Subramanian A, Tamayo P, Mootha VK, Mukherjee S, Ebert BL, Gillette MA, et al. Gene  
1144 set enrichment analysis: A knowledge-based approach for interpreting genome-wide  
1145 expression profiles. *Proceedings of the National Academy of Sciences* [Internet]. 2005 Oct  
1146 25 [cited 2019 Oct 3];102(43):15545–50. Available from:  
1147 <http://www.pnas.org/cgi/doi/10.1073/pnas.0506580102>
- 1148 73. Isserlin R, Merico D, Voisin V, Bader GD. Enrichment Map – a Cytoscape app to visualize  
1149 and explore OMICs pathway enrichment results. *F1000Res* [Internet]. 2014 Jul 1 [cited  
1150 2020 Jan 14];3. Available from: <https://www.ncbi.nlm.nih.gov/pmc/articles/PMC4103489/>
- 1151 74. Li J, Zhu L, Hull JJ, Liang S, Daniell H, Jin S, et al. Transcriptome analysis reveals a  
1152 comprehensive insect resistance response mechanism in cotton to infestation by the phloem  
1153 feeding insect *Bemisia tabaci* (whitefly). *Plant Biotechnol J* [Internet]. 2016 Oct [cited 2020  
1154 Jan 14];14(10):1956–75. Available from:  
1155 <https://www.ncbi.nlm.nih.gov/pmc/articles/PMC5042180/>
- 1156 75. Reimand J, Isserlin R, Voisin V, Kucera M, Tannus-Lopes C, Rostamianfar A, et al.  
1157 Pathway enrichment analysis of omics data [Internet]. *Bioinformatics*; 2017 Dec [cited

- 1158            2019 Oct 3]. Available from: <http://biorxiv.org/lookup/doi/10.1101/232835>  
1159    76. Hettmansperger TP, McKean JW. Robust Nonparametric Statistical Methods. 2nd edition.  
1160            Boca Raton, FL: CRC Press; 2010. 554 p.  
1161    77. Hocking RR. The Analysis of Linear Models. 1st edition. Monterey, Calif: Brooks/Cole  
1162            Pub Co; 1985. 385 p.  
1163  
1164

## 1165 **Supporting Information**

1166

1167 **S1 Fig. Individual heat maps displaying expression intensity for significantly up- and**  
1168 **downregulated host detection (HD), host detoxification (DTX) and immune defense (IM)**  
1169 **genes, including all tissue types for *N. cervinus* weevils feeding on different host plants or in**  
1170 **different experimental conditions.** (i) host-specific expression between weevils feeding on a)  
1171 Legumes vs. Other (for *N. cervinus* and *N. leucoloma*), b) Legumes vs. Citrus, c) Conventional vs  
1172 Organic orange hosts and d) Switch vs Maintain. (ii) contrasts between expression levels while  
1173 feeding on host plants from the same family Citrus vs. Citrus (Rutaceae:Citrinae), Legume vs  
1174 Legume (Fabaceae) and Other vs Other (Asteraceae). Shades of red indicate upregulation in Group  
1175 1 while shades of blue indicate upregulation in Group 2. Gray indicates that a median differential  
1176 expression value was not calculated due to a low DEG count.

1177

1178 **S2 Fig. EnrichmentMaps displaying differentially coexpressed gene sets, as determined by**  
1179 **GSEA products.** Gene Ontology (GO) term coloration in red indicates upregulation in G1,  
1180 whereas blue coloration indicates upregulation in G2; the host plant listed first always corresponds  
1181 to G1. (i) Weevil transcriptome comparisons while feeding on Legume vs. Other host plants: a)  
1182 *N. cervinus* head tissue comparison (Comparison C25i/n). b) *N. cervinus* abdomen tissue  
1183 comparison (Comparison C24i/n). c) *N. cervinus* immature tissue comparison (Comparison C56i).  
1184 (ii) Weevil transcriptome comparisons while feeding on Legume vs. Citrus host plants: a) *N.*  
1185 *cervinus* abdomen tissue comparison (Comparison C67i). b) *N. cervinus* head tissue comparison  
1186 (Comparison C66i). (iii) Weevil transcriptome comparisons while feeding on Conventional vs.  
1187 Organic host plants: a) *N. cervinus* abdomen tissue comparison (Comparison C39i). b) *N. cervinus*  
1188 head tissue comparison (Comparison C38i). c) *N. cervinus* citrus-citrus immature tissue  
1189 comparison (Comparisons C52i and C46i). (iv) Weevil transcriptome comparisons while feeding  
1190 on host plants within the same host-plant family: a) *N. cervinus* citrus-citrus abdomen tissue  
1191 comparison, (Comparisons C51i and C45i). b) *N. cervinus* citrus-citrus head tissue comparison  
1192 (Comparisons C50i and C44i). c) *N. cervinus* citrus-citrus immature tissue comparison  
1193 (Comparisons C52i and C46i). Left hemisphere represents an organic orange vs. rough lemon  
1194 comparison, whereas the right hemisphere represents a conventional orange vs. rough lemon  
1195 comparison. d) *N. cervinus* aster-aster abdomen tissue comparison (Comparison C26i/n). e) *N.*  
1196 *cervinus* head tissue comparison (Comparison C27i/n). (v) Switched vs. Maintained host plant  
1197 weevil transcriptome comparisons: a) *N. cervinus* abdomen tissue comparison (Comparison C70i).  
1198 b) *N. cervinus* head tissue comparison (Comparison C69i).

1199

1200 **S1 Table. List of collection records and samples organized by area.** General area indicates if  
1201 the weevils were gathered from the introduced (INT) or native (NAT) range. Locality name and  
1202 Coordinates provide locality details with location and state or province codes or names. Host plant  
1203 indicates the plants where weevils were collected from and were maintained in those hosts while  
1204 in the lab. When localities had multiple hosts, those are numbered and included in the lab sample  
1205 code. Lab sample codes include locality code with species designation (C and L), host number in



1206 that locality (some localities yielded samples from multiple host plants), tissue (A: head, B:  
1207 abdomen, I: immature) and preparation number. For samples involved in the switch experiment,  
1208 numbers in parentheses after the host label indicate switched to a new host plant (1) or maintained  
1209 in the natal host plant (2) (for example: "Quin71C1(2)A1" denotes the first RNA preparation of  
1210 head tissue from *N. cervinus* collected in FL on the one host present in that locality and maintained  
1211 in that natal host). Comparisons indicates in which comparison groups those samples were  
1212 included. Details of the comparisons are provided in Supplementary Table 2.

1213

1214 **S2 Table. Details of each group of contrasts used for differential expression analysis**  
1215 **organized by prediction.** Comparison names include species label: C = *N. cervinus*; L = *N.*  
1216 *leucoloma*; number within that species and range: i = both sample groups originated from the  
1217 introduced range; i/n = sample groups are from different ranges, one from introduced range and  
1218 one from the native range; n = both sample groups originated from the native range. Comparison  
1219 details include Species name, host plant, host plant groups, or experimental condition for each  
1220 sample group. Comparison groups display lab sample codes as detailed in S1 Table, which also  
1221 includes the geographic origin of each sample.

1222

1223 **S3 Table. Summary of significantly enriched GO terms derived from Enrichment Maps for**  
1224 **each comparison and tissue.** Significantly enriched GO terms are displayed by hypothesis,  
1225 species and tissue. Within each contrast, the numbers of significantly enriched GO terms and the  
1226 direction of enrichment are indicated together with the number of connections between GO terms  
1227 in each direction produced by Cytoscape.

1228

1229 **S4 Table. Summary of R packages used in this study.** List of R software and packages including  
1230 the sources for each module.

1231

1.

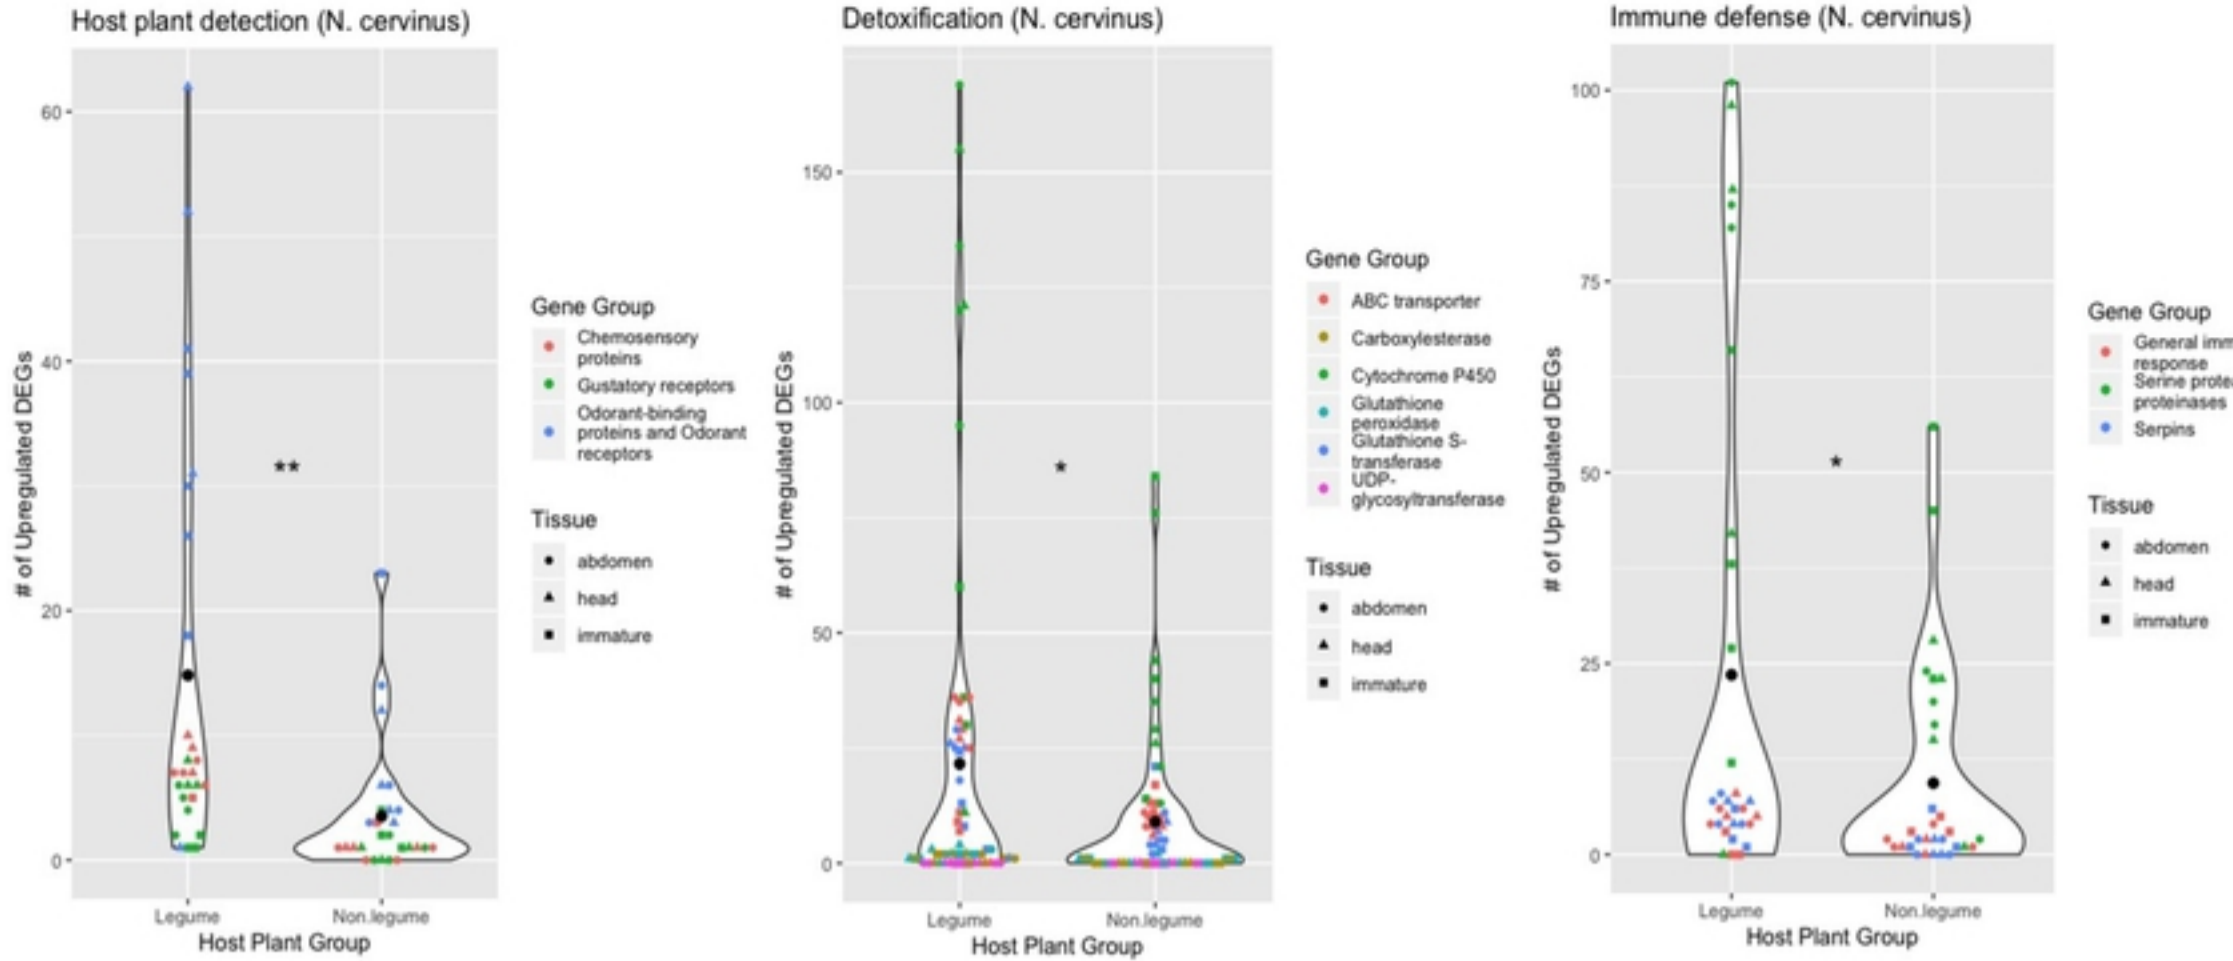

bioRxiv preprint doi: <https://doi.org/10.1101/2021.02.23.432442>; this version posted February 23, 2021. The copyright holder for this preprint (which was not certified by peer review) is the author/funder, who has granted bioRxiv a license to display the preprint in perpetuity. It is made available under aCC-BY 4.0 International license.

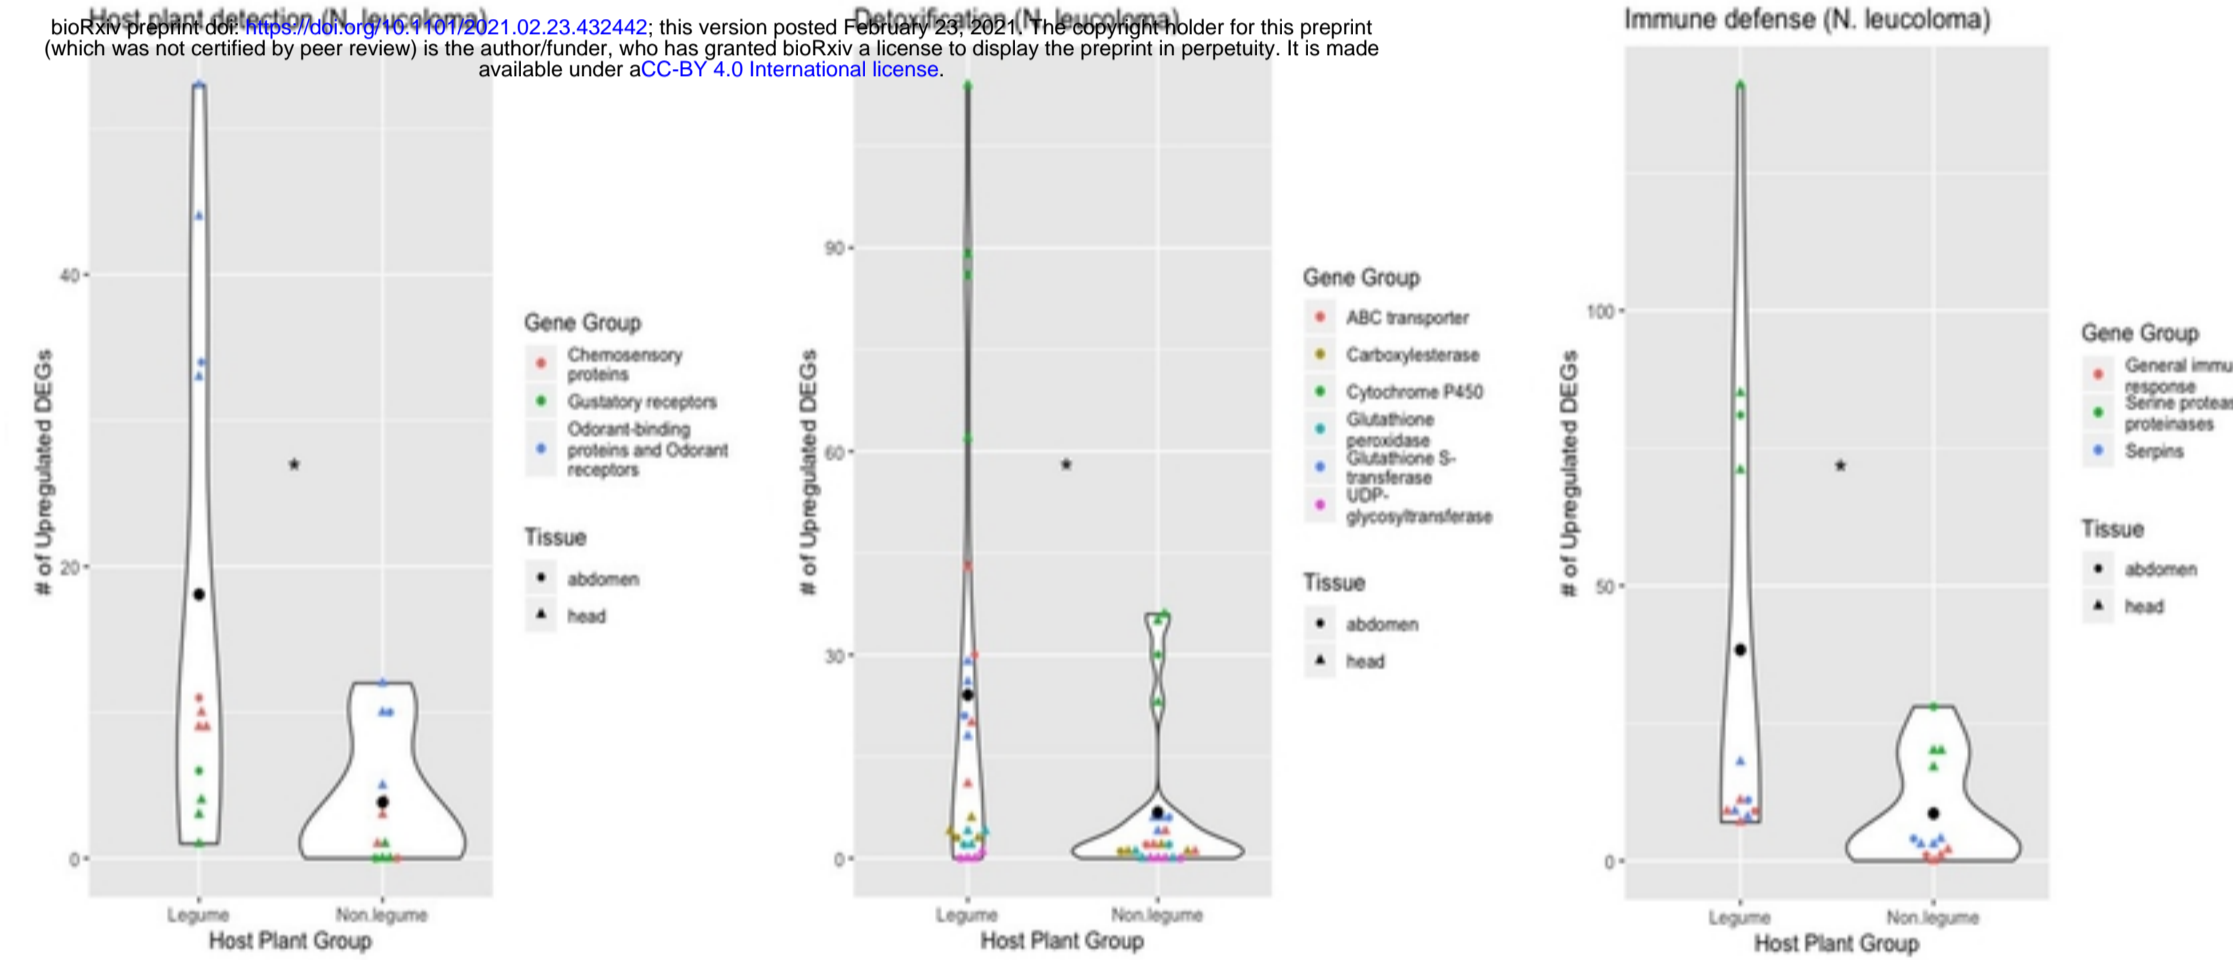

ii.

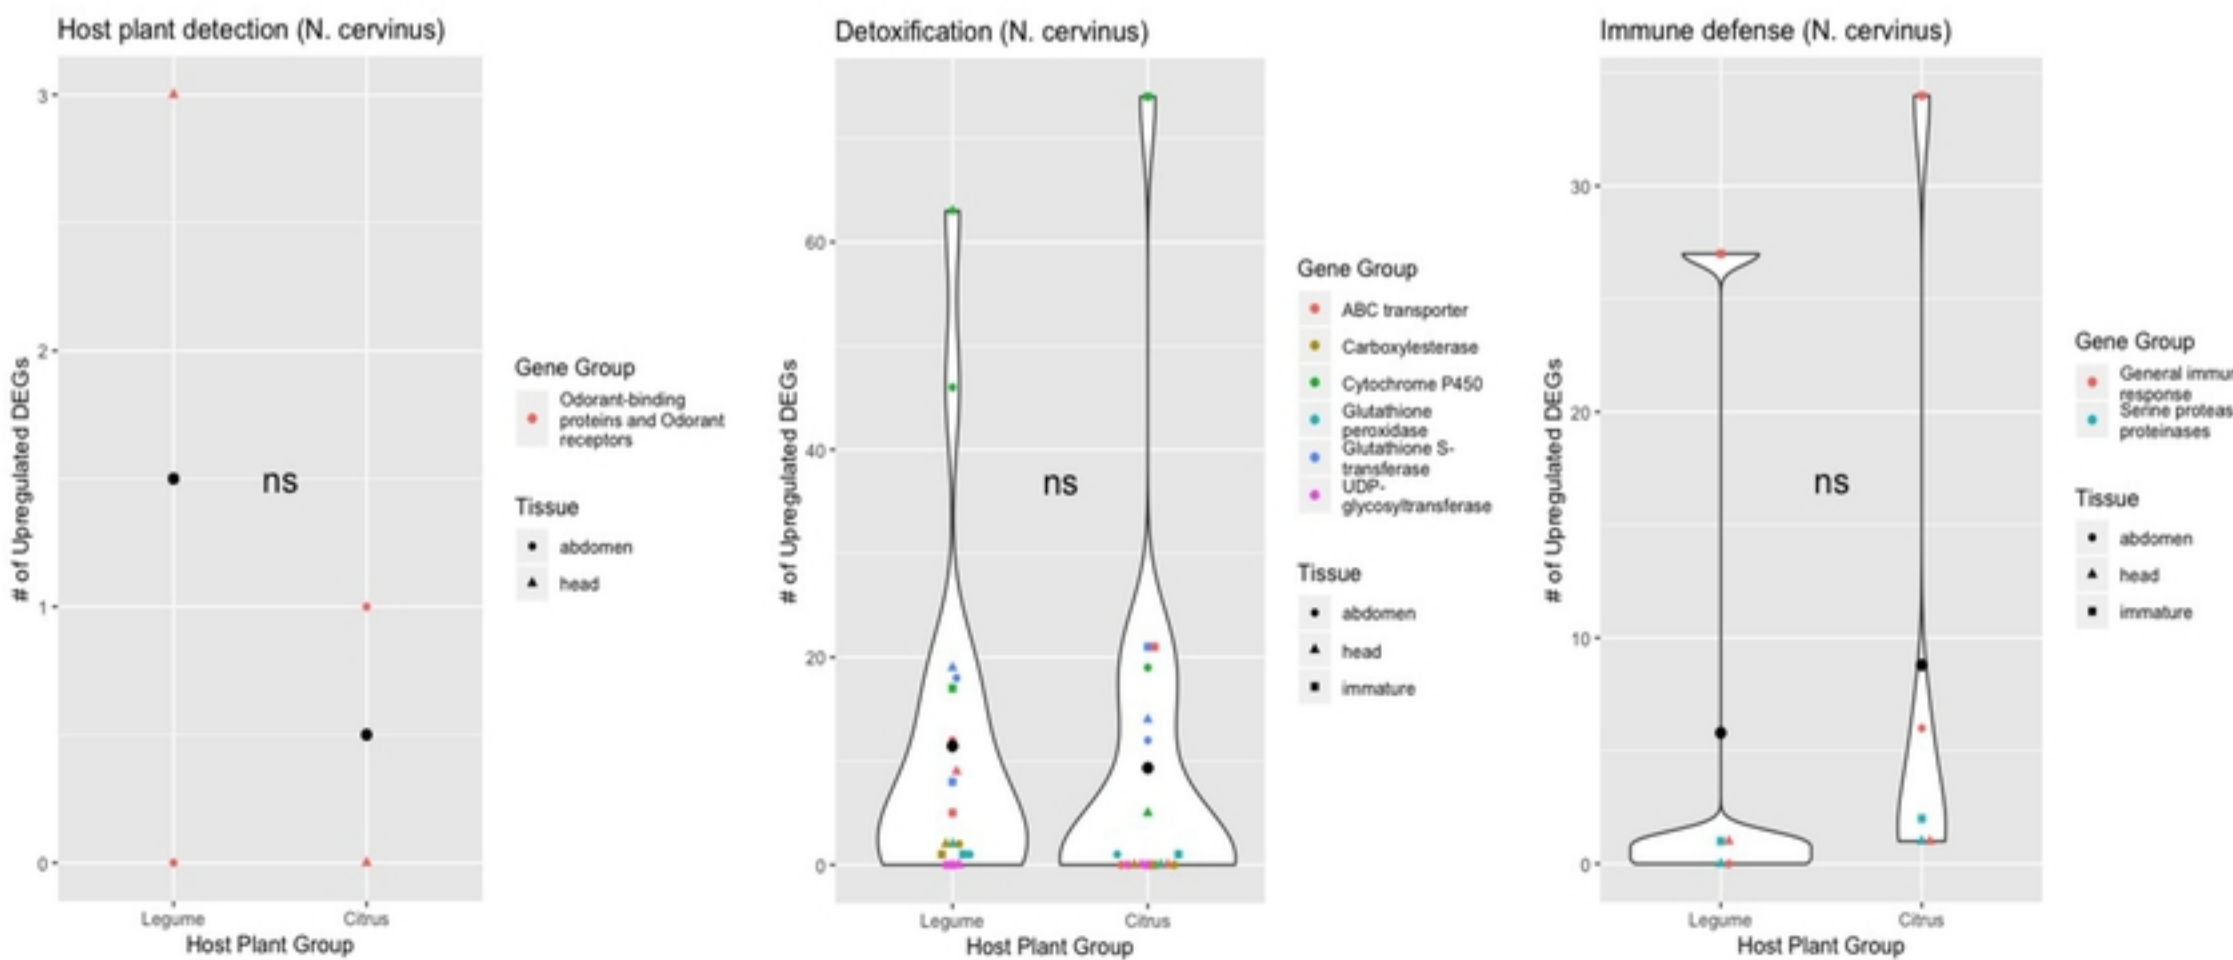

Figure 1a

iii.

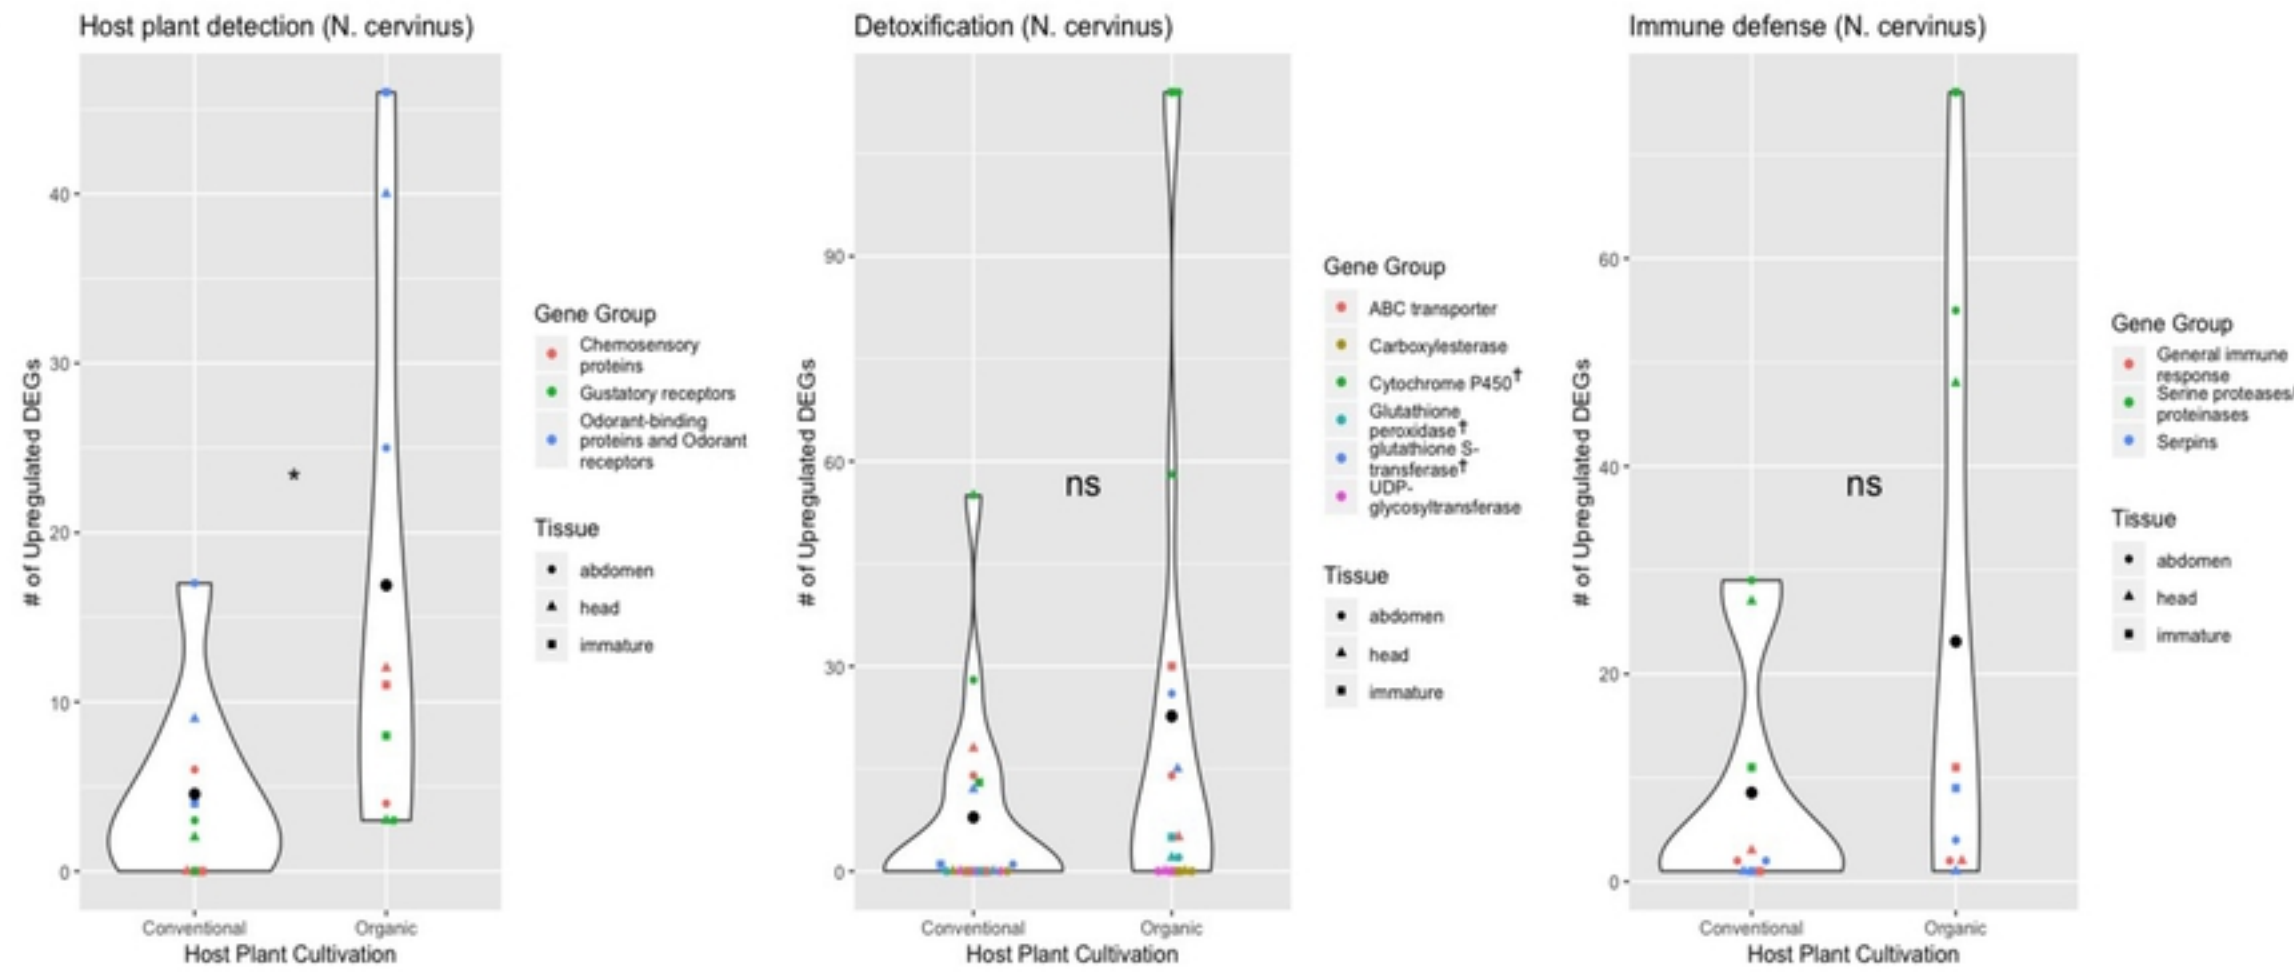

iv.

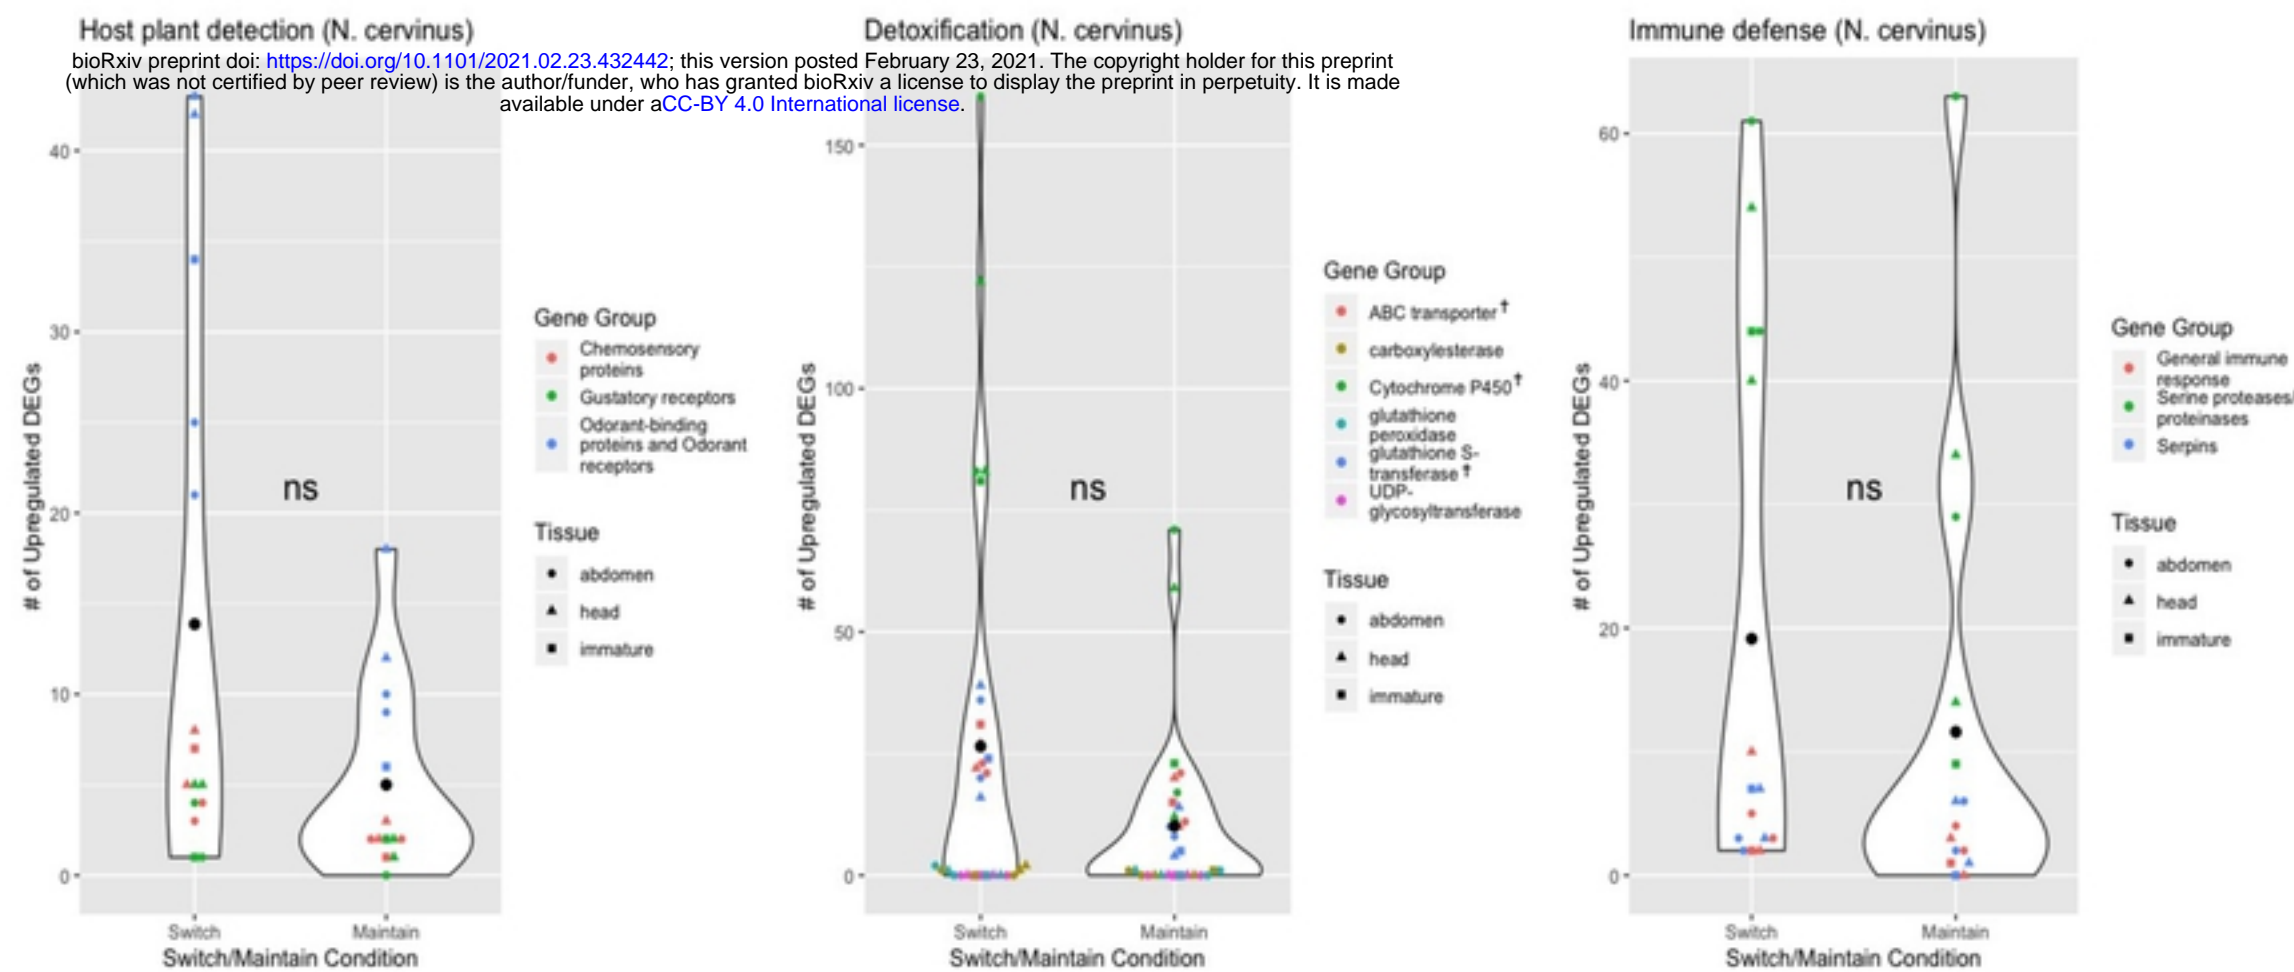

v.

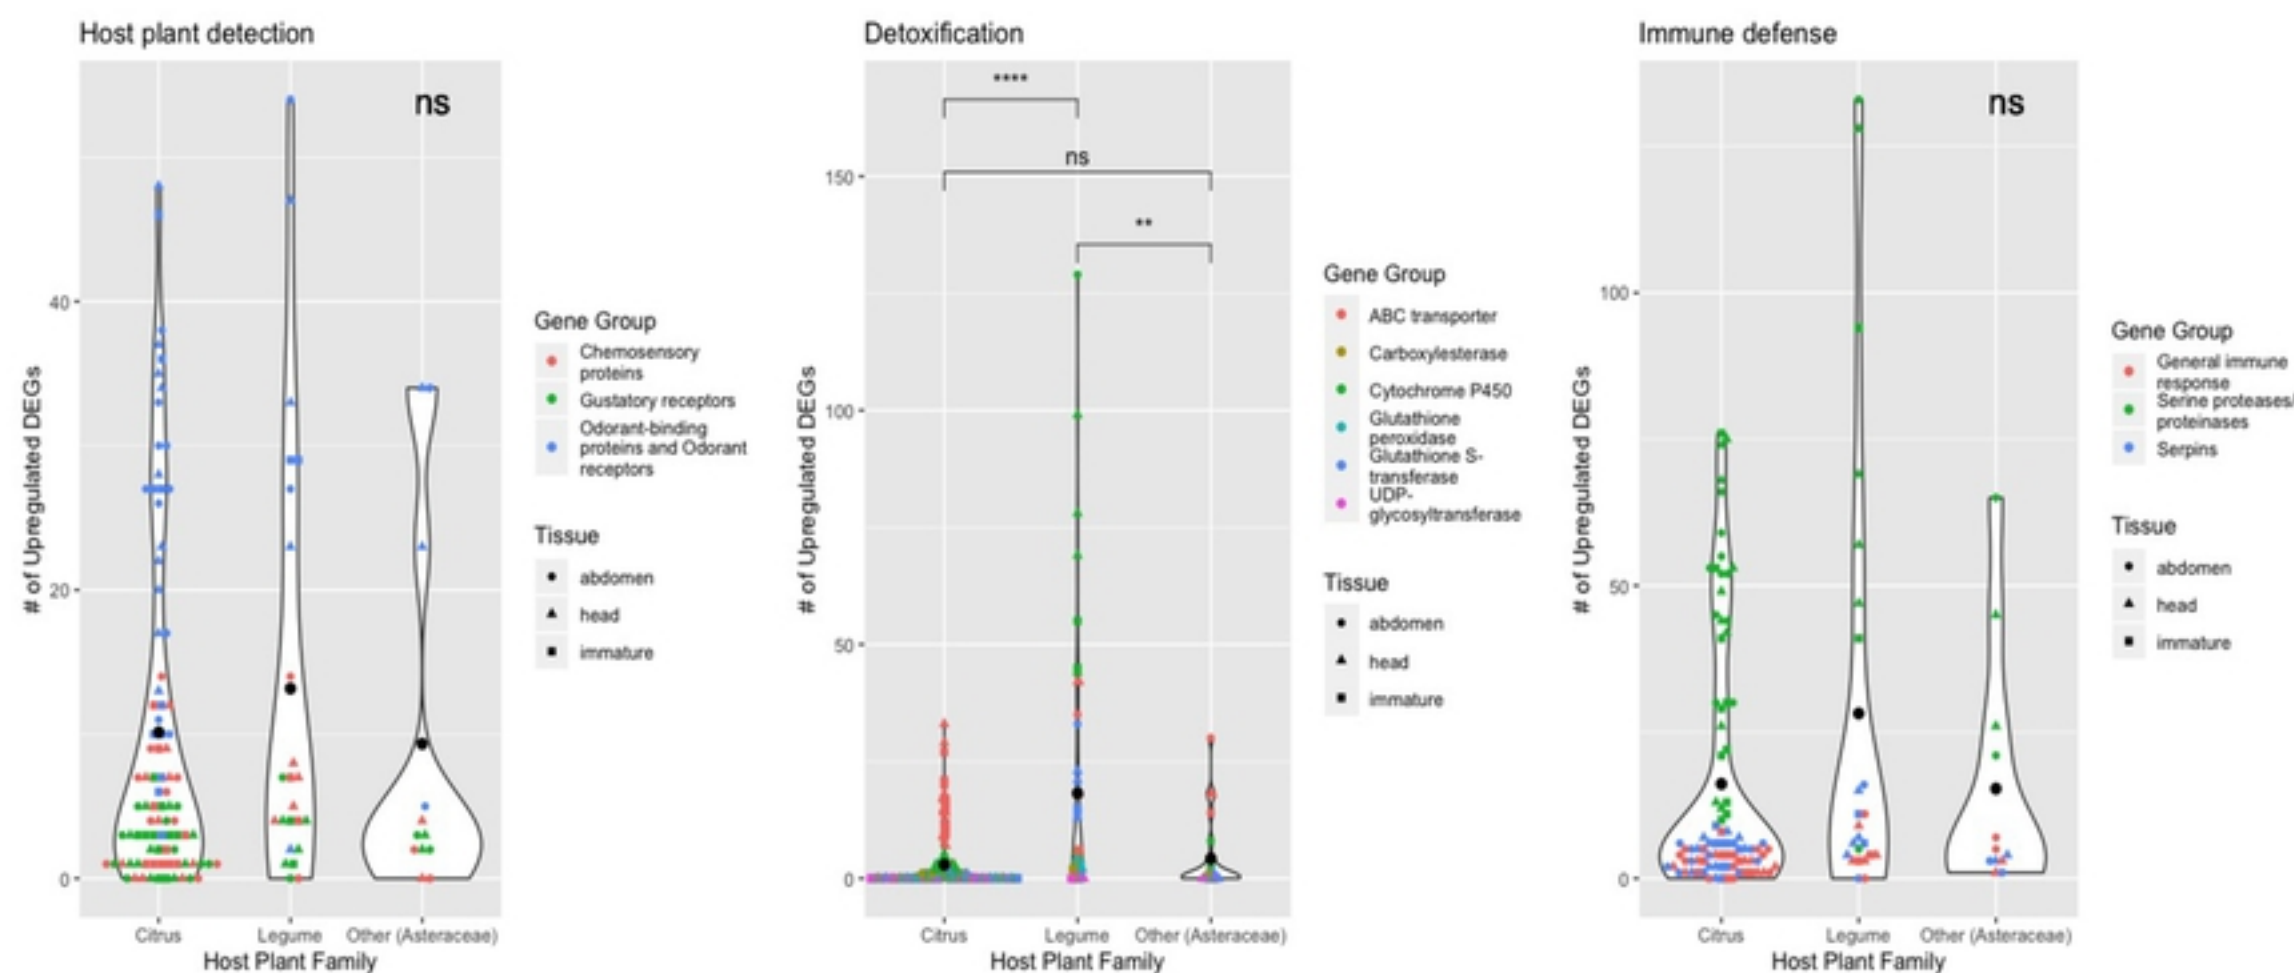

Figure 1b

i.

|                                                 |           |          | Positive DE<br>(overexpressed in G1,<br>underexpressed in G2) |     |     | Negative DE<br>(Underexpressed in G1,<br>overexpressed in G2) |     |     |
|-------------------------------------------------|-----------|----------|---------------------------------------------------------------|-----|-----|---------------------------------------------------------------|-----|-----|
|                                                 |           |          | HD                                                            | DTX | IM  | HD                                                            | DTX | IM  |
| Hypothesis A:<br>legume vs.<br>non-legume hosts | cervinus  | Head     |                                                               |     |     |                                                               |     |     |
|                                                 |           | Abd      |                                                               |     |     |                                                               |     |     |
|                                                 |           | Immature |                                                               |     |     |                                                               |     |     |
|                                                 | leucoloma | Head     |                                                               |     |     |                                                               |     |     |
|                                                 |           | Abd      |                                                               |     |     |                                                               |     |     |
|                                                 |           | Immature | N/D                                                           | N/D | N/D | N/D                                                           | N/D | N/D |
| Hypothesis C:<br>legume vs. citrus              | cervinus  | Head     |                                                               |     |     |                                                               |     |     |
|                                                 |           | Abd      |                                                               |     |     |                                                               |     |     |
|                                                 |           | Immature |                                                               |     |     |                                                               |     |     |
| Hypothesis E:<br>conventional vs.<br>organic    | cervinus  | Head     |                                                               |     |     |                                                               |     |     |
|                                                 |           | Abd      |                                                               |     |     |                                                               |     |     |
|                                                 |           | Immature |                                                               |     |     |                                                               |     |     |
| Hypothesis F:<br>switch vs.<br>non-switch       | cervinus  | Head     |                                                               |     |     |                                                               |     |     |
|                                                 |           | Abd      |                                                               |     |     |                                                               |     |     |
|                                                 |           | Immature |                                                               |     |     |                                                               |     |     |

ii.

|                                                                  |           |               | Positive DE<br>(overexpressed in G1,<br>underexpressed in G2) |     |     | Negative DE<br>(Underexpressed in G1,<br>overexpressed in G2) |     |     |
|------------------------------------------------------------------|-----------|---------------|---------------------------------------------------------------|-----|-----|---------------------------------------------------------------|-----|-----|
|                                                                  |           |               | HD                                                            | DTX | IM  | HD                                                            | DTX | IM  |
| Hypothesis D:<br>intra-host family<br>(citrus, legume,<br>other) | cervinus  | Gene Cat      | HD                                                            | DTX | IM  | HD                                                            | DTX | IM  |
|                                                                  |           | Within family | c. vs. c (all conv.)                                          |     |     |                                                               |     |     |
|                                                                  |           | Head          |                                                               |     |     |                                                               |     |     |
|                                                                  |           | Abdomen       |                                                               |     |     |                                                               |     |     |
|                                                                  | leucoloma | Within family | l vs. l                                                       |     |     |                                                               |     |     |
|                                                                  |           | Head          |                                                               |     |     |                                                               |     |     |
|                                                                  |           | Abdomen       |                                                               |     |     |                                                               |     |     |
|                                                                  |           | Immature      |                                                               |     |     |                                                               |     |     |
|                                                                  | cervinus  | Within family | o vs. o                                                       |     |     |                                                               |     |     |
|                                                                  |           | Head          |                                                               |     |     |                                                               |     |     |
|                                                                  |           | Abdomen       |                                                               |     |     |                                                               |     |     |
|                                                                  |           | Immature      | N/D                                                           | N/D | N/D | N/D                                                           | N/D | N/D |

Figure 2

1.

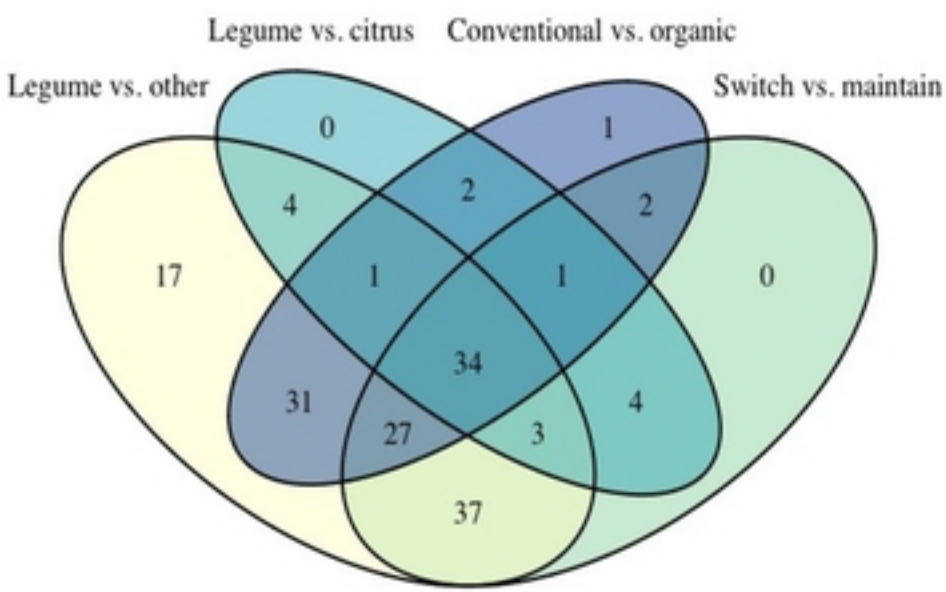

ii.

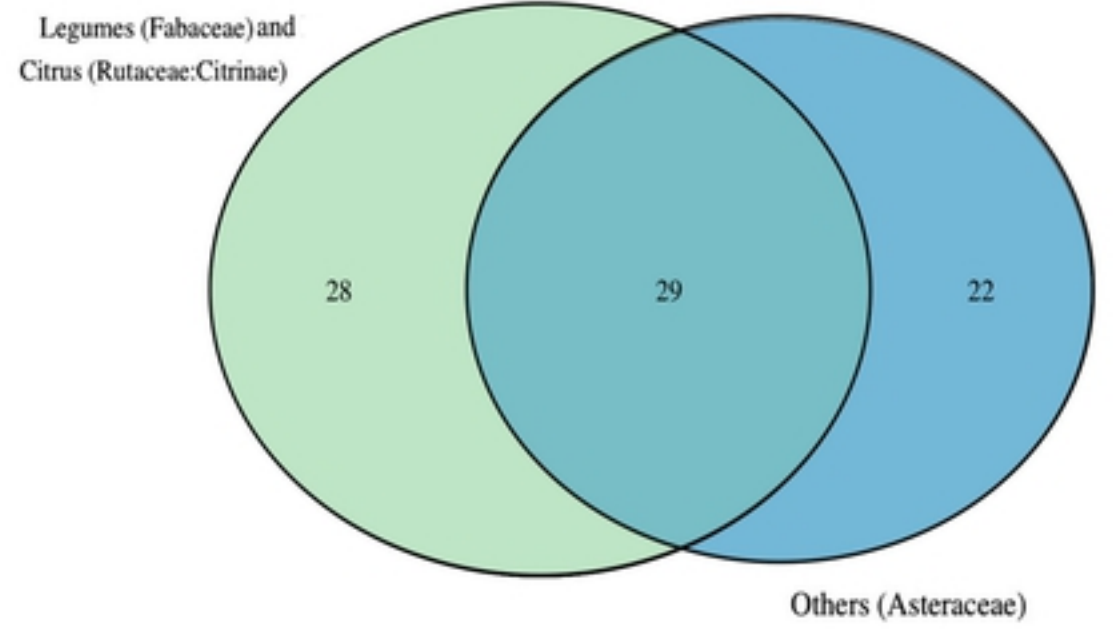

### Host detection (HD)

bioRxiv preprint doi: <https://doi.org/10.1101/2021.02.23.432442>; this version posted February 23, 2021. The copyright holder for this preprint (which was not certified by peer review) is the author/funder, who has granted bioRxiv a license to display the preprint in perpetuity. It is made available under aCC-BY 4.0 International license.

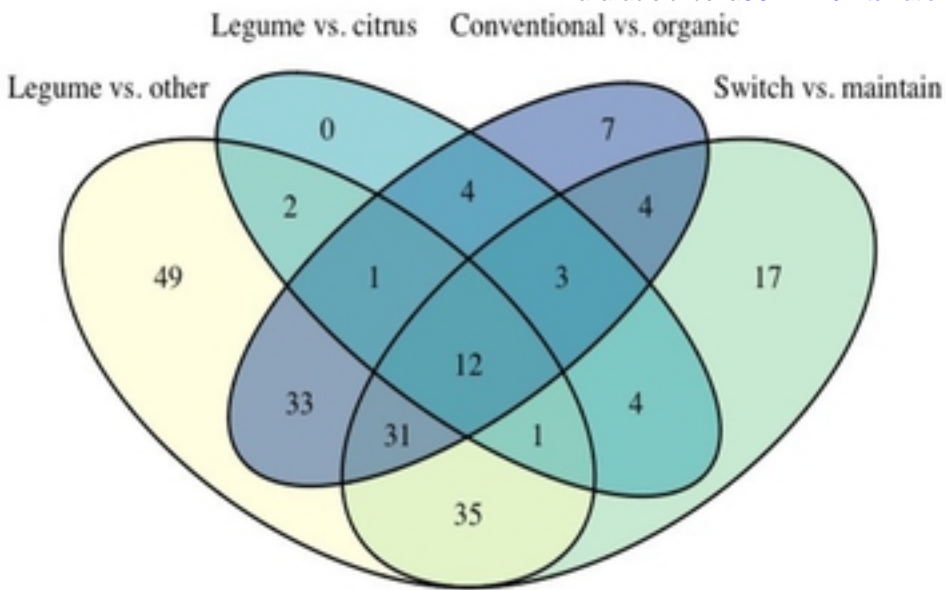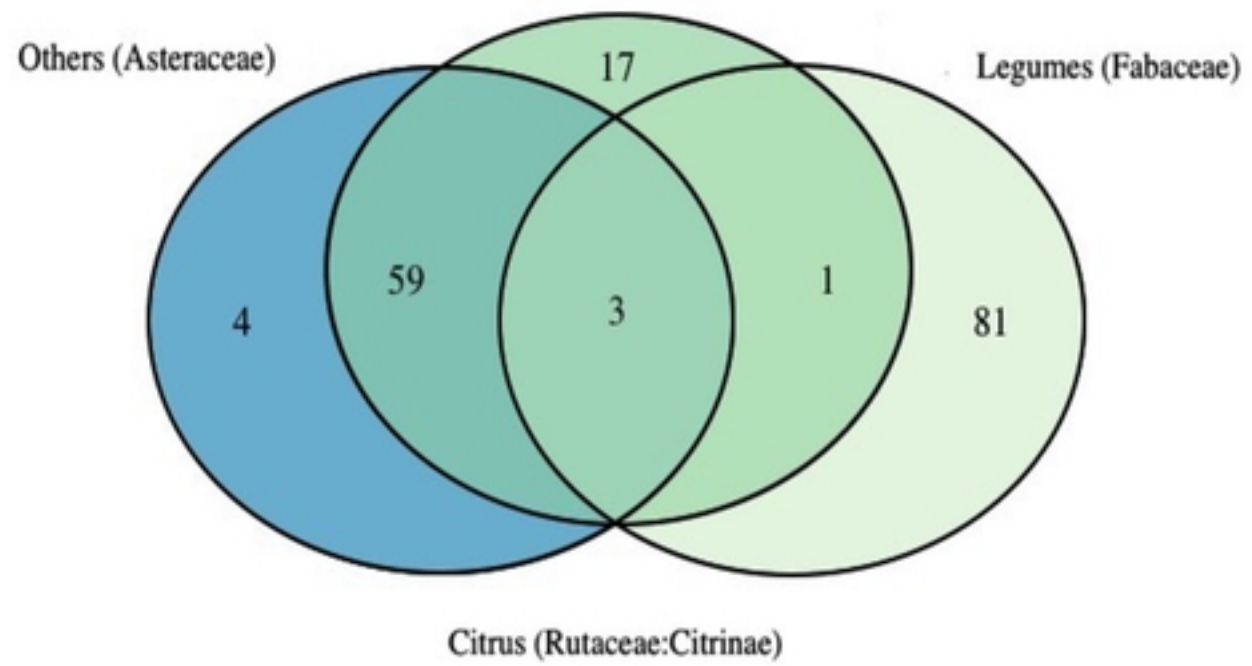

### Detoxification (DTX)

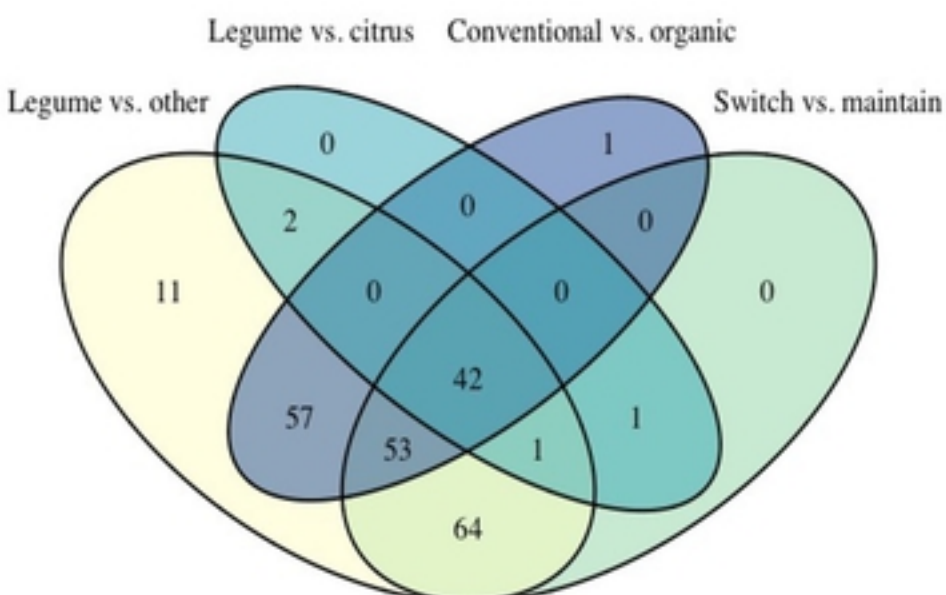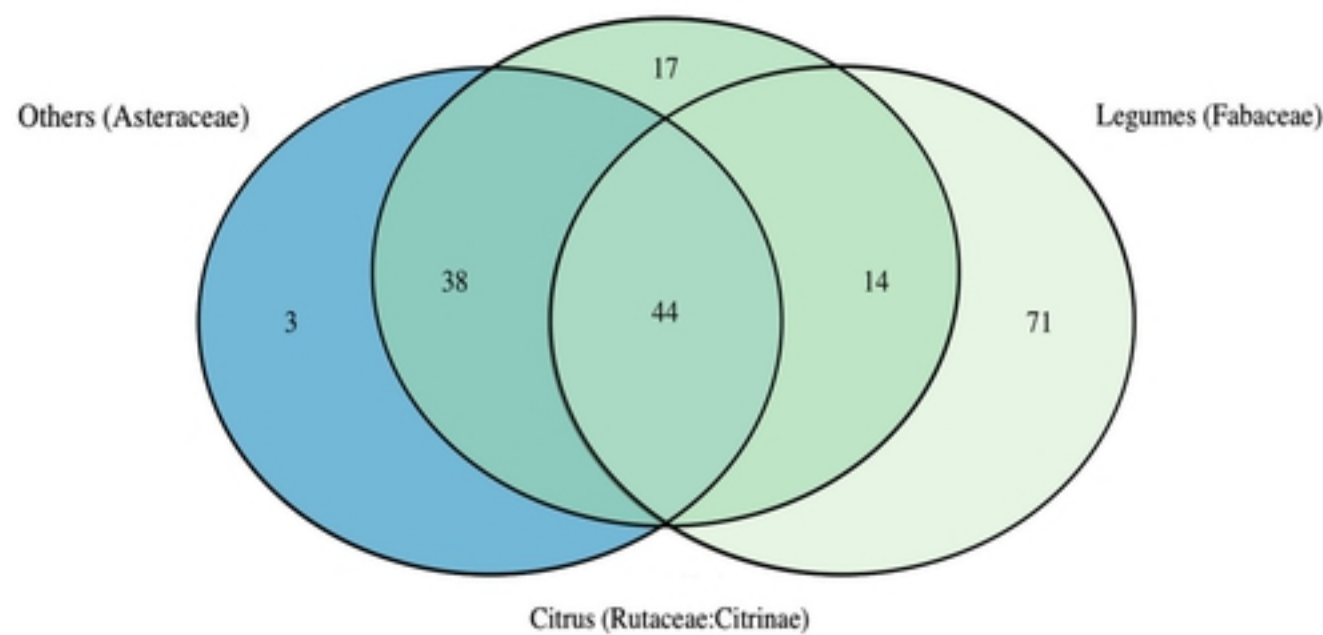

### Immune defense (IM)

Figure 3

1.

Legume vs. citrus

Conventional vs. organic

Switch vs. maintain

Legume vs. other

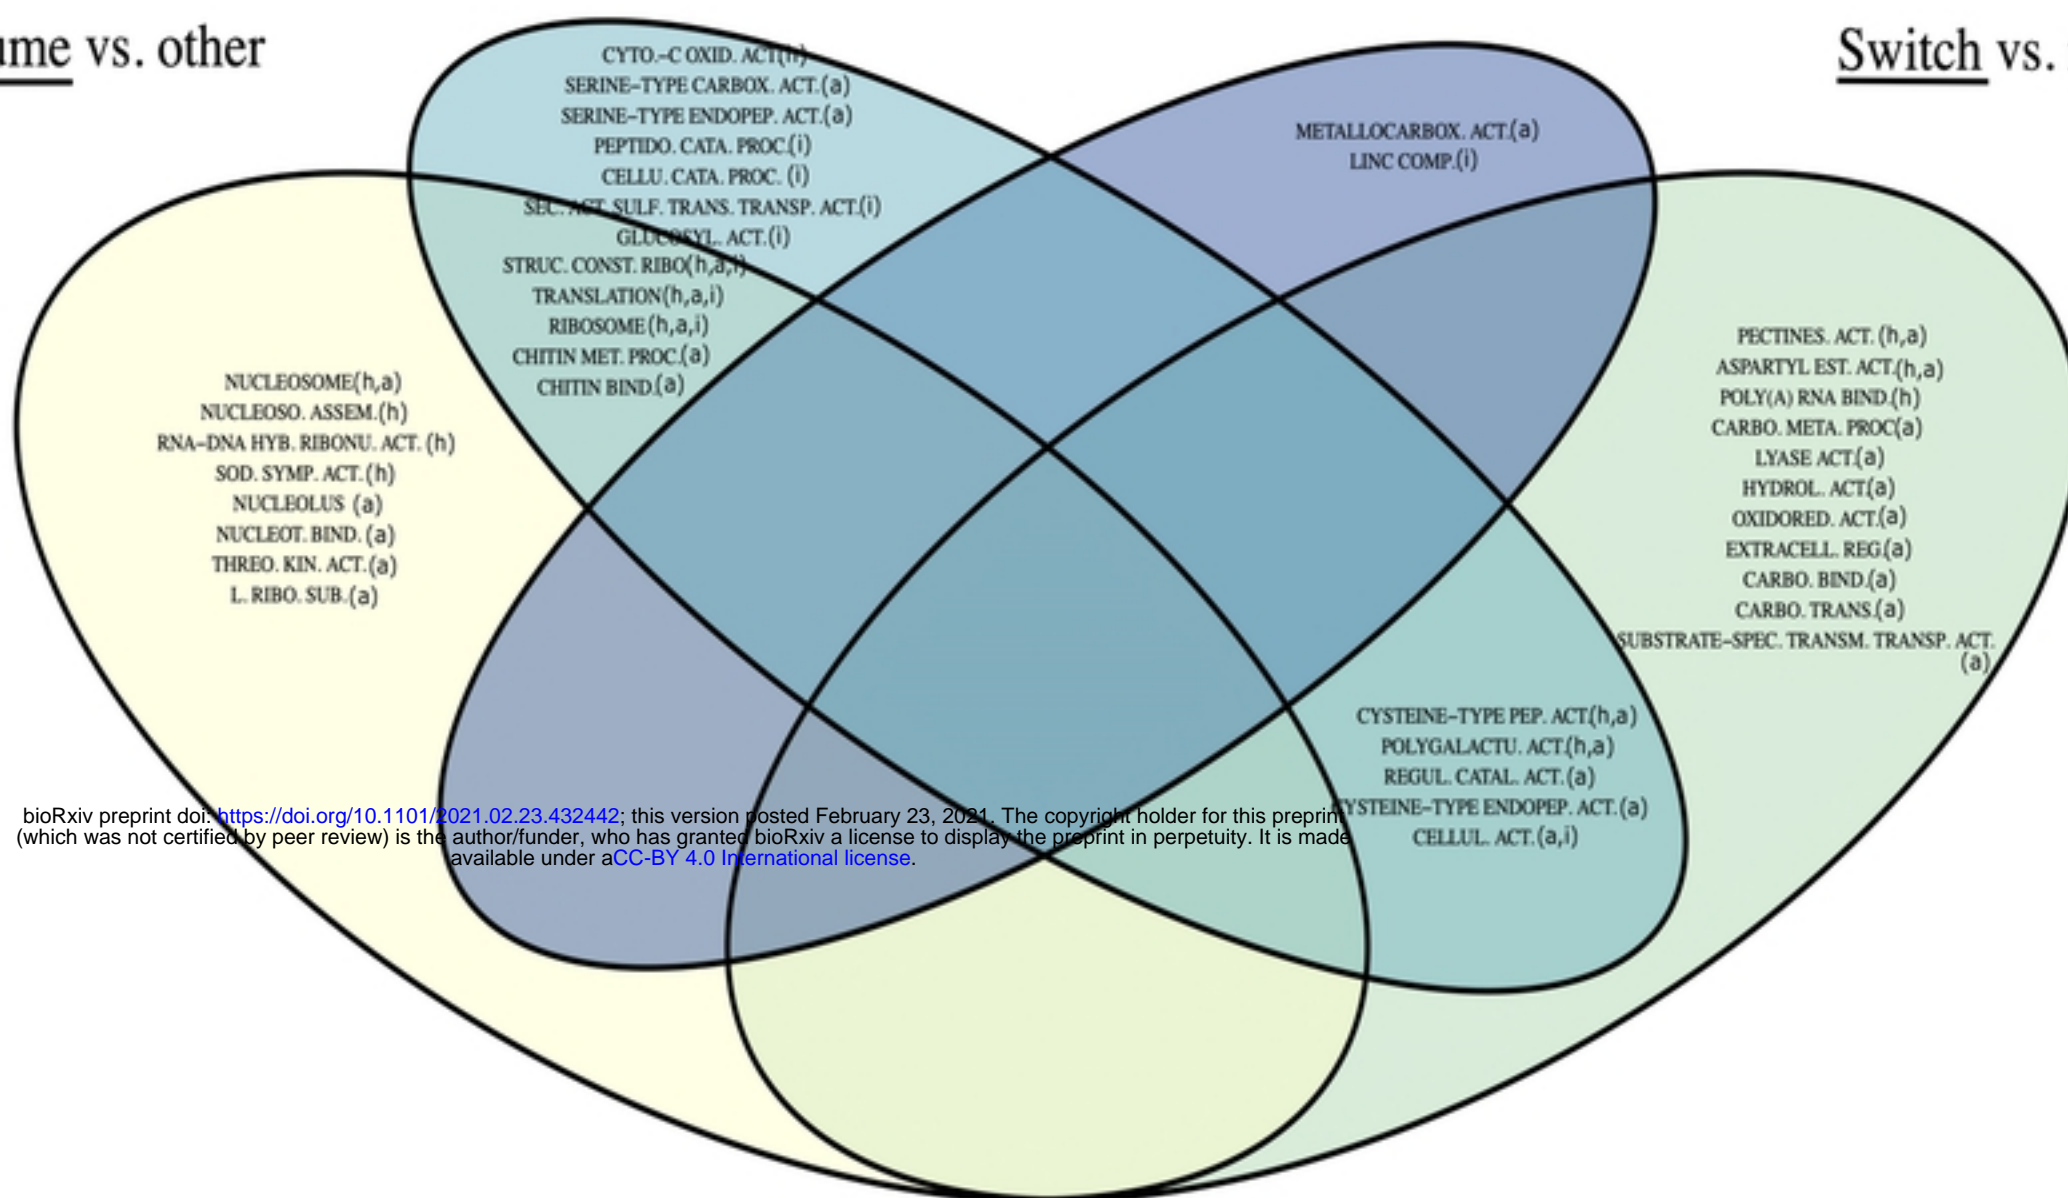

ii.

Legume vs. citrus

Conventional vs. organic

Switch vs. maintain

Legume vs. other

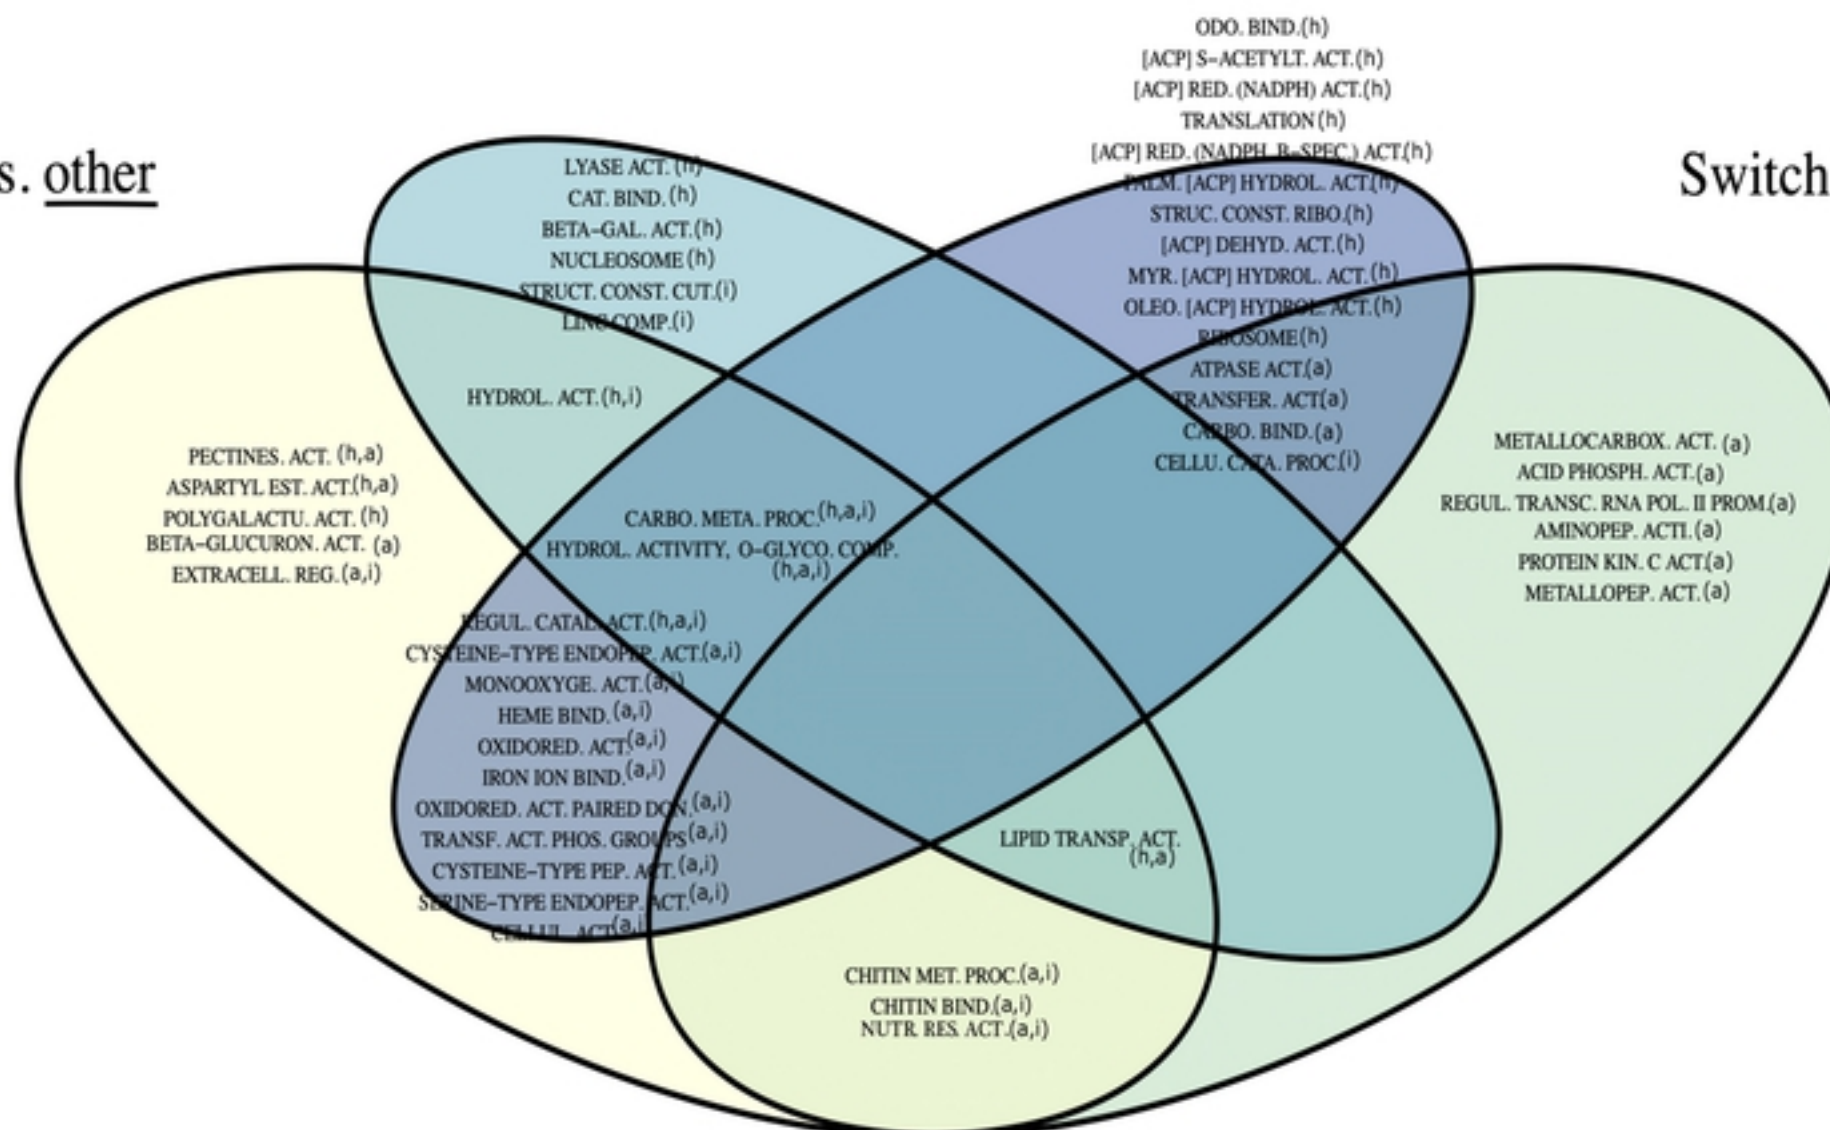

Figure 4
